# Supplementary material for: Novel, linear oligoisoindole compounds with a conjugated electronic structure
Source: Royal Society of Chemistry journal article supplement (doi:10.1039/c7qo00631d), 2017-01-01
Supplement: c7qo00631d1.pdf [file c7qo00631d1.pdf]

## **Electronic Supplementary Information**

### **Novel Linear Oligoisoindole Compounds with Conjugated Electronic Structure**

Yuehong Zhang, Chiming Wang, Xin Chen, Houhe Pan, Dongdong Qi,\* Kang Wang,\*  
and Jianzhuang Jiang\*

## Caption of Content

1. NMR spectra section, pages S3-S4.
2. IR spectra section, page S5.
3. Simulated electronic absorption spectra section, pages S6-S7.
4. Experimental section, pages S8-S15;
5. Synthesis of linear oligoisoindole derivatives, Scheme S1, page S16;
6. Isotopic patterns and HR MS for **1-4**, Fig. S1-S4, pages S17-S20;
7. NMR spectra for **1-4**, Fig. S5-S15, pages S21-S31;
8. X-ray crystal structures of **1** and **4**, Fig. S16-17, pages S32-33;
9. Differential pulse voltammograms for **1-4**, Fig. S18, page S34;
10. Simulated absorption spectra for **1-4**, Fig. S19-S22, pages S35-S38;
11. The  $\pi$  bond order of cyclic oligoisoindoles and the phthalocyanine ring-cleavage derivative, Fig. S23, page S39;
12. IR spectra for **1-3**, Fig. S24, page S40;
13. Tautomeric conformations for **1-4**, Fig. S25, page S41;
14.  $^{13}\text{C}$  NMR spectra for **1-3**, Fig. S26-S28, pages S42-S44;
15. The  $\pi$  MBO of **1-4**, cyclic oligoisoindoles, and the phthalocyanine ring-cleavage derivative, Fig. S29-S30, pages S45-S46;
16. X-ray crystal structure of **3**, Fig. S31, page S47;
17. MS, NMR and IR spectra for **5**, Fig. S32-S35, pages S48-S51;
18. NMR data for **1-4**, Table S1, page S52;
19. Crystallographic data for **1**, **3**, **4**, and **5**, Table S2, page S53;
20. Electron density difference plots of electron transitions for **1-4**, Tables S3-S6, pages S54-S57.

**NMR spectra.** As shown in Fig. S5, the  $^1\text{H}$  NMR spectrum of **1** exhibits two singlets at  $\delta = 7.77$  and  $6.42$  ppm due to the isoindole  $\alpha$  protons. The signals for the aromatic protons of 2,6-diisopropylphenoxy substituents exhibited several multiplets in the range of  $\delta 7.27$ - $7.23$  ppm. The multiplets observed at  $\delta 3.16$ - $3.13$  ppm were attributed to the methyne protons on the 2,6-diisopropylphenoxy groups. The signals for the methyl protons on the 2,6-diisopropylphenoxy groups and protons on the  $\text{SC}_{12}\text{H}_{25}$  chains are partially overlapped, leading to the observation of the multiplet in the range of  $\delta 1.25$ - $1.06$  ppm and two triplets at  $\delta = 2.81$  and  $0.85$  ppm, respectively. As for **2**, Fig. S6 its  $^1\text{H}$  NMR spectrum exhibits one broad signal at  $\delta = 9.84$  ppm due to the isoindole N-H proton. The signals for isoindole  $\alpha$  protons exhibited five singlets at  $\delta = 7.92$ ,  $6.85$ ,  $6.67$ ,  $6.59$ , and  $6.44$  ppm, respectively, and were partially overlapped by the signals for the aromatic protons of 2,6-diisopropylphenoxy substituents which exhibited several multiplets in the range of  $\delta 7.41$ - $7.23$  ppm. The multiplet observed in the range of  $\delta 3.16$ - $3.10$  ppm is attributed to the methyne protons on the 2,6-diisopropylphenoxy groups. The signals for the methyl protons on the 2,6-diisopropylphenoxy groups and protons on the  $\text{SC}_{12}\text{H}_{25}$  side chain are partially overlapped, leading to the observation of the multiplet in the range of  $\delta 1.25$ - $1.06$  ppm and two triplets at  $\delta = 2.70$  and  $0.85$  ppm, respectively. Similar to that of **3**, the singlet at  $\delta = 4.05$  ppm with the integral of two is assigned to the protons from one of the outer isoindole. As shown in Fig. S7, the  $^1\text{H}$  NMR spectrum of compound **4** exhibits two broad signals at  $\delta = 10.03$  and  $8.85$  ppm due to the isoindole N-H protons. The signals for the isoindole  $\alpha$  protons were observed at  $\delta = 7.52$  and  $6.74$  ppm and partially overlapped with the signals of the aromatic protons on the 2,6-diisopropylphenoxy substituents appearing at  $\delta 7.42$ - $7.19$ ,  $6.92$ ,  $6.62$ - $6.57$  and  $6.31$  ppm. The multiplets in the range of  $\delta 3.47$ - $2.98$  and  $1.33$ - $0.72$  ppm are attributed to the methyne and methyl protons of 2,6-diisopropylphenoxy substituents,

respectively. Similar to those of **2** and **3**, the singlet at  $\delta = 4.17$  ppm is assigned to the protons from the  $\text{sp}^2/\text{sp}^3$  terminal carbon atoms. The above mentioned assignment was further confirmed by the  $^1\text{H}$ - $^1\text{H}$  COSY spectroscopic results of these compounds, Fig. S9-S13. Similar to compound **3**, there is also tautomerization of the N-H protons between the outer and inner isoindole units in compounds **2** and **4**, as shown in Fig. S11, S13, and S15. However, owing to the quite close energy between tautomer A and B in compound **2**, the coupling signals between the N-H protons from the isoindole units and the protons from the  $\text{sp}^2/\text{sp}^3$  terminal carbon atoms could not be observed in the  $^1\text{H}$ - $^1\text{H}$  COSY spectrum even at the temperature as low as 233 K.

**IR spectra.** The IR spectra of **1-3** were shown in Fig. S24. In addition to the bands associated with the oligoisoindole skeletons for **1-3** such as the C-H wagging and torsion vibrations (*ca.* 770 and 729  $\text{cm}^{-1}$ ), and the isoindole ring stretching vibrations (*ca.* 1445 and 1385  $\text{cm}^{-1}$ ),<sup>1</sup> the bands observed at *ca.* 2962, 2927, and 2868  $\text{cm}^{-1}$  are assigned to the asymmetric and symmetric C-H stretching vibrations of the  $-\text{CH}_3$  groups, while those at 1255 and 1046  $\text{cm}^{-1}$  are ascribed to the asymmetric and symmetric C-O-C stretching vibrations of the 2,6-diisopropylphenoxy groups.<sup>2</sup> For **1** and **2**, a medium band at 2851  $\text{cm}^{-1}$  is also found, due to the symmetric C-H stretching vibration of the methylene groups from the  $\text{SC}_{12}\text{H}_{25}$  side chain(s).<sup>3</sup>

**Simulated Electronic Absorption Spectra.** As easily expected,<sup>4</sup> despite the slightly overestimated transition energies, the simulated spectra for **1-4** are in good agreement with the experimental ones, Fig. S19-S22. As exemplified by compound **1** shown in Fig. S19 and Table S3, the intense absorptions in the region from 375 to 525 nm mainly originate from the transitions from HOMO/HOMO-4 to LUMO, involving electron density moving from the peripheral substituents to the conjugated diisoindole core together with the electron density rearrangement within the diisoindole core. While the weak absorption from 300 to 375 nm is associated with the electron transition from HOMO-2 to LUMO+1, mainly involving electron density transfer from peripheral substituents to the inner diisoindole core. The nature of the strong absorption from 250 to 300 nm is complicated, which is formed by coupling of absorptions mainly associated with the electron transitions from HOMO-2 to LUMO+3/LUMO+7 and HOMO-1 to LUMO+4/LUMO+8, involving electron density moving from the diisoindole core to the peripheral substituents. For compound **2**, Fig. S20 and Table S4, the intense absorption in the region from 375 to 550 nm mainly originates from the transitions from HOMO/HOMO-1 to LUMO, involving electron density moving from the peripheral substituents and conjugated core of the two C-C linked isoindole moieties (that do not contain the sp<sup>3</sup> hybridized carbon atom) to the conjugated triisoindole core. The weak absorption from 300 to 375 nm is formed by coupling of absorptions mainly associated with the electron transitions from HOMO-3/HOMO-5/HOMO-6/HOMO-7/HOMO-9 to LUMO and HOMO to LUMO+1/LUMO+2, involving electron density moving from the peripheral substituents to the conjugated trisoindole core together with the electron density rearrangement within the trisoindole core. This is also true for the strong absorption in the range from 250 to 300 nm, formed by coupling of absorptions mainly associated with the electron transitions from HOMO to LUMO+8/LUMO+9, HOMO-1 to LUMO+4/LUMO+11/LUMO+14, and HOMO-2 to LUMO+2/LUMO+9, involving

electron density moving from the peripheral substituents and conjugated core of the two isoindoles linked by C-C bond to the peripheral substituents. This is also true for compound **3** and **4**, Fig. S21 and S22, and Tables S5 and S6.

## Experimental Section

**General Remarks:** Column chromatography was carried out on silica gel (Merck, Kieselgel 60, 70-230 mesh) column with the indicated eluents. All other reagents and solvents were used as received. 4,5-Bis(2,6-diisopropylphenoxy)phthalonitrile<sup>5</sup> was prepared according to the published procedure. NMR spectra were recorded on a Bruker DPX 400 spectrometer. Spectra were referenced internally using the residual solvent resonances relative to SiMe<sub>4</sub>. Electronic absorption spectra were recorded on a Lambda 750 spectrophotometer. Fluorescence spectra were recorded on an F4500 (Hitachi) with the excitation wavelength of 510 nm and Rhodamine B was employed as the reference compound to obtain the fluorescence quantum yields. IR spectra were recorded as KBr pellets using a Bruker Tensor 37 spectrometer with 2 cm<sup>-1</sup> resolution. HR (high resolution) MALDI-TOF mass spectra were recorded on Solarix FT-ICR-MS with *dithranol* as the matrix. Electrochemical measurements were carried out with a BAS CV-50W voltammetric analyzer. The cell comprised inlets for a glassy-carbon-disk working electrode with a diameter of 2.0 mm in diameter and a silver-ware counter electrode. The reference electrode was Ag<sup>+</sup>/Ag (a solution of 0.01 M AgNO<sub>3</sub> and 0.1 M TBAP in acetonitrile), which was connected to the solution by a Luggin capillary whose tip was placed close to the working electrode. It was corrected for junction potentials by being referenced internally to the ferrocenium/ferrocene (Fc<sup>+</sup>/Fc) couple [ $E_{1/2}(\text{Fc}^+/\text{Fc}) = 0.501 \text{ V vs. SCE}$ ]. Typically, a 0.1 M solution of [NBu<sub>4</sub>][ClO<sub>4</sub>] in CH<sub>2</sub>Cl<sub>2</sub> containing 1 mM of sample was purged with nitrogen for 10 min, and then the voltammograms were recorded at ambient temperature. The scan rate was 20 mV/s for the electrochemical measurement.

**X-ray crystallographic analysis of 1, 3, 4 and 5.** Single crystals of **1**, **3**, **4** and **5** suitable for X-ray diffraction analysis were obtained by slow diffusion of methanol into the toluene, CHCl<sub>3</sub>, CH<sub>2</sub>Cl<sub>2</sub> and CHCl<sub>3</sub> solution of respective compound, respectively. The



linear diisindole **1** crystallizes in the triclinic space group *P1* with one molecule per unit cell, while the tetraisindole **3** crystallizes in the monoclinic space group *P21/c* with two molecules per unit cell, the hexaisindole **4** crystallizes in the triclinic space group *P-1* with two molecules per unit cell, and the tetraisindole **5** crystallizes in the triclinic space group *P-1* with one molecule per unit cell. The corresponding crystallographic and structural data are summarized in Table S2. Data were collected on an Oxford Diffraction Gemini E system with Cu<sub>Kα</sub> radiation  $\lambda = 1.5418 \text{ \AA}$  at 150 K, using a  $\omega$  scan mode with an increment of 1°. Preliminary unit cell parameters were obtained from 30 frames. Final unit cell parameters were obtained by global refinements of reflections obtained from integration of all the frame data. The collected frames were integrated using the preliminary cell-orientation matrix. The SMART software was used for data collecting and processing; ABSpack for absorption correction;<sup>6</sup> and SHELXL for space group and structure determination, refinements, graphics, and structure reporting.<sup>7</sup> CCDC-1510099, 1542987, 1546494, and 1550842 contain the supplementary crystallographic data for this paper. These data can be obtained free of charge from the Cambridge Crystallographic Data Centre via [www.ccdc.cam.ac.uk/data\\_request/cif](http://www.ccdc.cam.ac.uk/data_request/cif).

**Density functional theory (DFT) and time-dependent density functional theory (TD-DFT) together with Mayer bond order (MBO) analysis.** The DFT method was used to calculate the electronic structures of **1-4** and the corresponding Mayer bond order, and the TD-DFT method was used to simulate the electronic absorption spectra of **1-4**. In all the cases, the functional and basis set of  $\tau$ HCTHhyb/6-31G(d) was employed. The probabilities of the tautomers are calculated on the basis below: If one molecule has *N*

tautomers, the ratio of *n*th tautomer can be calculated using

$$Ratio(n) = \frac{e^{-\frac{E_n}{kT}}}{\sum_{i=1}^N e^{-\frac{E_i}{kT}}}, \text{ where } E_n$$

is the energy of the  $n$ th isomer,  $k$  is the Boltzmann constant, and  $T$  is the temperature. All the calculations were carried out by using the Gaussian 09 (Revision D.01) program.<sup>8</sup>

The Mayer bond order (MBO)<sup>9</sup> between Atom A and Atom B is defined in the following manner:

$$BO_{AB} = BO_{AB}^{\alpha} + BO_{AB}^{\beta} = 2 \sum_{a \in A} \sum_{b \in B} [(P^{\alpha}S)_{ba}(P^{\alpha}S)_{ab} + (P^{\beta}S)_{ba}(P^{\beta}S)_{ab}]$$

where  $P^{\alpha}$  and  $P^{\beta}$  is the  $\alpha$ -spin and  $\beta$ -spin density matrix, respectively;  $S$  is the overlap matrix between Orbital  $a$  and Orbital  $b$  defined as  $S = \int \varphi_a(\vec{r})\varphi_b(\vec{r})d\vec{r}$ .

When the  $\sigma$  electrons are deleted in the wave function, the  $\pi$ -MBO<sup>10</sup> will be calculated out to clarify the  $\pi$  bonding nature. The choice of  $\sigma/\pi$  electrons can be controlled by the coefficient of basis functions:

$$\pi BO_{AB} = \pi BO_{AB}^{\alpha} + \pi BO_{AB}^{\beta} = 2 \sum_{a \in A} \sum_{b \in B} [(P^{\alpha}S_{\pi})_{ba}(P^{\alpha}S_{\pi})_{ab} + (P^{\beta}S_{\pi})_{ba}(P^{\beta}S_{\pi})_{ab}]$$

$$S_{\pi} = \int \varphi_{\pi a}(\vec{r})\varphi_{\pi b}(\vec{r})d\vec{r}$$

$$\varphi_i(\vec{r}) = \varphi_{\pi i}(\vec{r}) + \varphi_{\sigma i}(\vec{r})$$

$$\begin{cases} \varphi_{\pi i}(\vec{r}) = \mu_i \sum_l \gamma_{\pi} C_{l,i} \chi_l(\vec{r}) : \begin{cases} \text{if } \chi_l(\vec{r}) \text{ is pure } \pi \text{ type, } \gamma_{\pi} = 1 \\ \text{if } \chi_l(\vec{r}) \text{ is pure } \sigma \text{ type, } \gamma_{\pi} = 0 \end{cases} \\ \varphi_{\sigma i}(\vec{r}) = \mu_i \sum_l \gamma_{\sigma} C_{l,i} \chi_l(\vec{r}) : \begin{cases} \text{if } \chi_l(\vec{r}) \text{ is pure } \pi \text{ type, } \gamma_{\sigma} = 0 \\ \text{if } \chi_l(\vec{r}) \text{ is pure } \sigma \text{ type, } \gamma_{\sigma} = 1 \end{cases} \end{cases}$$

where  $\varphi_{\pi i}(\vec{r})$  and  $\varphi_{\sigma i}(\vec{r})$  are the modified wave function of orbital  $i$ , which only describes the  $\pi$  and  $\sigma$  orbitals, respectively;  $\mu_i$  is the occupying number of the  $i$ th orbital;  $\chi_l(\vec{r})$  is the  $l$ th basis function in the  $i$ th orbital;  $\gamma_{\sigma}$  and  $\gamma_{\pi}$  is the signal of  $\chi_l(\vec{r})$  type;  $C_{l,i}$  is the element of  $l$ th row and  $j$ th column in the expansion coefficient matrix.

It is worth noting that the judgment of  $\sigma/\pi$  type of the basis function  $\chi_l(\vec{r})$  is the key point in the calculation of  $\pi$ -MBO. When the Pople basis set is employed, the judgment is based on the mathematical expression of the given basis function.

1) If the mathematical expression is *s*-type, for example  $\chi_s(v, \vec{r}) = \left(\frac{2v}{\pi}\right)^{\frac{3}{4}} e^{-\alpha \vec{r}^2}$ ,<sup>11</sup>

this basis function should be a pure  $\sigma$ -type. Here,  $\gamma_\sigma$  is 1 while  $\gamma_\pi$  is 0.

2) If the mathematical expression is *p*-type, for example

$\chi_{p_x}(v, \vec{r}) = \left(\frac{128v^5}{\pi^3}\right)^{\frac{1}{4}} x e^{-\alpha \vec{r}^2}$ ,<sup>11</sup> this condition should be divided into three cases:

2.1) If this basis function is symmetric relative to the given conjugated plane (in other word, this basis function should be parallel to the given conjugated plane), it should be a pure  $\sigma$ -type function. Here,  $\gamma_\sigma$  is 1 while  $\gamma_\pi$  is 0.

2.2) If this basis function is anti-symmetric relative to the given conjugated plane (in other word, this basis function should be vertical to the given conjugated plane), it should be a pure  $\sigma$ -type function. Here,  $\gamma_\sigma$  is 1 while  $\gamma_\pi$  is 0.

2.3) If this basis function is neither parallel nor vertical, but sloping to the given conjugated plane, it should be considered as a contributor to both  $\sigma$ -bonding and  $\pi$ -bonding. If  $\theta$  is set to describe the angle between this basis function and the given conjugated plane,  $\gamma_\sigma$  will be expressed as  $\cos(\theta)$  meanwhile  $\gamma_\pi$  as  $\sin(\theta)$ .

In the present work, the N-H tautomerization is a special difficulty in the bond order analyses. For example, there are 3 isomers for **3**, Fig. S25. The average  $\pi$ -MBO can be expressed as

$$\overline{\pi BO}_{AB} = \sum_{n=1}^3 (\pi BO_{AB})_n \frac{e^{-\frac{E_n}{kT}}}{e^{-\frac{E_1}{kT}} + e^{-\frac{E_2}{kT}} + e^{-\frac{E_3}{kT}}}$$

where  $(\pi BO_{AB})_n$  is the  $\pi$  Mayer bond order ( $\pi$ -MBO) of the *n*th isomer,  $E_n$  is the energy of the *n*th isomer,  $k$  is the Boltzmann constant, and  $T$  is the temperature.

**Preparation of the linear oligoisindole compounds 1-4.** Sodium metal (25 mg) was dissolved in 2.5 mL of dodecanethiol at 100 °C. After all sodium was dissolved, 4,5-bis(2,6-diisopropylphenoxy)phthalonitrile (300 mg, 0.625 mmol) was added and the

mixture was stirred for 1 h at the same temperature. Then, the reaction temperature was elevated to 180 °C and stirred for 1 h. After cooling to room temperature, the reaction solution was applied on a silica gel column for chromatography. CHCl<sub>3</sub>/*n*-hexane = 1/1 (v/v) first eluted a yellowish band containing diisoindole **1**, which was followed by the second blue band containing phthalocyanine (24.3mg, 8.1%), the third orange band containing triisoindole derivative **2**, the fourth red band containing tetraisoindole compound **3**. Further elution led to the isolation of trace amount of hexaisoindole compound **4**. Repeated chromatography followed by recrystallization from CHCl<sub>3</sub> and CH<sub>3</sub>OH gave **1**, **2**, **3** and **4** as yellow, orange, red, and green powder in the yield of (17.1mg, 5.7%), (6.0mg, 2.0%), (24.9mg, 8.3%), and (0.6mg, 0.2%), respectively.

Compound **1**. <sup>1</sup>H NMR (CD<sub>2</sub>Cl<sub>2</sub>, 400 MHz): 7.77 (s, 2 H), 7.27-7.23 (m, 12 H), 6.42 (s, 2 H), 3.16-3.13 (m, 8 H), 2.81 (t, 4 H, *J* = 4 Hz), 1.25-1.06 (m, 88 H), 0.86 (t, 6 H, *J* = 4 Hz); <sup>13</sup>C NMR (CDCl<sub>3</sub>, 100 MHz): δ 171.2, 149.5, 148.7, 148.5, 148.4, 144.7, 141.8, 141.7, 133.4, 131.6, 126.3, 126.1, 124.8, 124.6, 111.5, 104.6, 32.0, 31.0, 29.7, 29.7, 29.6, 29.4, 29.4, 29.3, 29.2, 28.3, 28.0, 27.3, 23.9, 22.8, 22.8, 13.9, 0.9; UV/Vis (CHCl<sub>3</sub>): λ<sub>max</sub> (logε)= 284 (4.57), 353 (3.88), 432 (4.45), 455 nm (4.49); HR MS: an isotopic cluster peaking at *m/z* 1335.8918, Calcd. for C<sub>88</sub>H<sub>123</sub>N<sub>2</sub>O<sub>4</sub>S<sub>2</sub>, [*M*+*H*]<sup>+</sup> 1335.8919.

Compound **2**. <sup>1</sup>H NMR (CD<sub>2</sub>Cl<sub>2</sub>, 400 MHz): 9.84 (br, 1H), 7.92 (s, 1 H), 7.41-7.23 (m, 19 H), 6.85 (s, 1 H), 6.67 (s, 1 H), 6.59 (s, 1 H), 6.44 (s, 1 H), 4.05 (s, 2H), 3.16-3.10 (m, 12 H), 2.70 (t, 2 H, *J* = 4 Hz), 1.25-1.07 (m, 92 H), 0.85 (t, 3 H, *J* = 4 Hz); <sup>13</sup>C NMR (CDCl<sub>3</sub>, 100 MHz): δ 165.0, 151.4, 149.4, 148.9, 148.7, 148.6, 148.5, 148.3, 148.1, 142.0, 141.8, 141.7, 141.6, 141.3, 136.4, 131.8, 126.2, 126.0, 125.8, 124.7, 124.5, 124.3, 108.7, 108.1, 107.3, 104.6, 31.0, 30.6, 29.7, 29.6, 29.3, 28.2, 27.8, 27.3, 27.2, 27.1, 24.0, 23.8, 23.2, 22.7, 14.1, 1.0; UV/Vis (CHCl<sub>3</sub>): λ<sub>max</sub> (logε)= 284 (4.77), 352 (4.31), 476 (4.62), 501

(4.59), 534 nm (4.34); HR MS: an isotopic cluster peaking at  $m/z$  1618.0259, Calcd. for  $C_{108}H_{137}N_4O_6S$ ,  $[M+H]^+$  1618.0253.

Compound **3**.  $^1H$  NMR ( $CD_2Cl_2$ , 400 MHz): 9.69 (br, 2 H), 7.52 (s, 2 H), 7.37-7.08 (m, 24 H), 6.83 (s, 2 H), 6.70 (s, 2 H), 6.56 (s, 2 H), 3.96 (s, 4 H), 3.19-3.12 (m, 16 H), 1.12-1.06 (m, 96 H);  $^{13}C$  NMR ( $CDCl_3$ , 100 MHz):  $\delta$  149.1, 148.9, 148.8, 148.6, 148.5, 143.4, 142.1, 141.8, 141.7, 141.5, 136.4, 133.1, 132.4, 128.4, 126.4, 126.3, 125.9, 125.4, 124.8, 124.7, 124.6, 124.4, 109.7, 108.3, 107.4, 106.7, 27.5, 27.4, 27.3, 24.3, 23.8, 23.3, 22.9; UV/Vis ( $CHCl_3$ ):  $\lambda_{max}$  (log $\epsilon$ ) = 345 (4.42), 492 (4.59), 522 (4.72), 559 nm (4.64); HR MS: an isotopic cluster peaking at  $m/z$  1900.1584, Calcd. for  $C_{128}H_{151}N_6O_8$ ,  $[M-H]^+$  1900.1588.

Compound **4**.  $^1H$  NMR ( $CD_2Cl_2$ , 400 MHz): 10.02 (br, 2 H), 8.85 (br, 1 H), 7.52 (s, 2 H), 7.42-7.19 (m, 30 H), 6.92 (m, 4 H), 6.74 (s, 2 H), 6.62-6.57 (m, 6 H), 6.31 (m, 4 H), 4.17 (s, 4 H), 3.47-2.98 (m, 24 H), 1.33-0.72 (m, 144 H); HR MS: an isotopic cluster peaking at  $m/z$  2846.7122, Calcd. for  $C_{192}H_{223}N_9O_{12}$ ,  $[M]^+$  2846.7111.

**Preparation of the linear tetraisoindole 5.** By employing the above-described procedure with 4,5-bis(2,6-dimethylphenoxy)phthalonitrile instead of 4,5-bis(2,6-diisopropylphenoxy)phthalonitrile as the starting material, the linear tetraisoindole analogue **5** was isolated in the yield of 2.4%.  $^1H$  NMR ( $CD_2Cl_2$ , 400 MHz): 9.92 (br, 2 H), 7.61 (s, 2 H), 7.26-7.08 (m, 24 H), 6.61 (s, 2 H), 6.57 (s, 2 H), 6.50 (s, 2 H), 4.21 (s, 4 H), 2.24-2.16 (m, 48H);  $^{13}C$  NMR ( $CDCl_3$ , 100 MHz):  $\delta$  170.1, 164.4, 151.9, 151.1, 150.9, 150.7, 150.1, 147.8, 147.5, 147.3, 143.2, 136.7, 133.0, 132.8, 131.2, 131.0, 129.3, 129.2, 129.0, 128.3, 125.6, 125.5, 125.2, 124.7, 110.3, 107.9, 107.0, 106.3, 50.1, 16.3, 16.2, 16.2; UV/Vis ( $CHCl_3$ ):  $\lambda_{max}$  (log $\epsilon$ )= 344 (4.50), 491 (4.67), 520 (4.80), 556 nm

(4.71); HR MS: an isotopic cluster peaking at  $m/z$  1451.6571, Calcd. for  $C_{96}H_{87}N_6O_8$ ,  $[M-H]^+$  1451.6580.

## References

- 1 H. Shang, H. Wang, W. Li and J. Jiang, *Vib. Spectrosc.*, 2013, **69**, 8.
- 2 S. Dong, D. Qi, Y. Zhang, J. Jiang and Y. Bian, *Vib. Spectrosc.*, 2011, **56**, 245.
- 3 J. Jiang, M. Bao, L. Rintoul and D. P. Arnold, *Coord. Chem. Rev.*, 2006, **250**, 424 and references therein.
- 4 (a) H. Pan, C. Chen, K. Wang, W. Li and J. Jiang, *Chem. Eur. J.*, 2015, **21**, 3168; (b) Y. Zhang, L. Zhao, K. Wang and J. Jiang, *Inorg. Chem. Front.*, 2017, **4**, 104.
- 5 H. Pan, W. Liu, C. Wang, K. Wang and J. Jiang, *Chem. Eur. J.*, 2016, **22**, 9488.
- 6 R. H. Blessing, *Acta Crystallogr.*, 1995, **A51**, 33.
- 7 *SHELXL Reference Manual*, Version 5.1; Bruker Analytical X-Ray Systems: Madison, WI, 1997.
- 8 Gaussian 09, Revision D.01, M. J. Frisch, G. W. Trucks, H. B. Schlegel, G. E. Scuseria, M. A. Robb, J. R. Cheeseman, G. Scalmani, V. Barone, B. Mennucci, G. A. Petersson, H. Nakatsuji, M. Caricato, X. Li, H. P. Hratchian, A. F. Izmaylov, J. Bloino, G. Zheng, J. L. Sonnenberg, M. Hada, M. Ehara, K. Toyota, R. Fukuda, J. Hasegawa, M. Ishida, T. Nakajima, Y. Honda, O. Kitao, H. Nakai, T. Vreven, J. A. Montgomery, Jr., J. E. Peralta, F. Ogliaro, M. Bearpark, J. J. Heyd, E. Brothers, K. N. Kudin, V. N. Staroverov, T. Keith, R. Kobayashi, J. Normand, K. Raghavachari, A. Rendell, J. C. Burant, S. S. Iyengar, J. Tomasi, M. Cossi, N. Rega, J. M. Millam, M. Klene, J. E. Knox, J. B. Cross, V. Bakken, C. Adamo, J. Jaramillo, R. Gomperts, R. E. Stratmann, O. Yazyev, A. J. Austin, R. Cammi, C. Pomelli, J. W. Ochterski, R. L. Martin, K. Morokuma, V. G.

Zakrzewski, G. A. Voth, P. Salvador, J. J. Dannenberg, S. Dapprich, A. D. Daniels, O. Farkas, J. B. Foresman, J. V. Ortiz, J. Cioslowski, and D. J. Fox, Gaussian, Inc., Wallingford CT, 2013.

9 I. Mayer, *Chem. Phys. Lett.*, **1983**, 97, 270.

10 D. Qi and J. Jiang, *Int. J. Quantum Chem.*, **2013**, 113, 2605.

11 R. Ditchfield, W. J. Hehre and J. A. Pople, *J. Chem. Phys.*, **1971**, 54, 724.

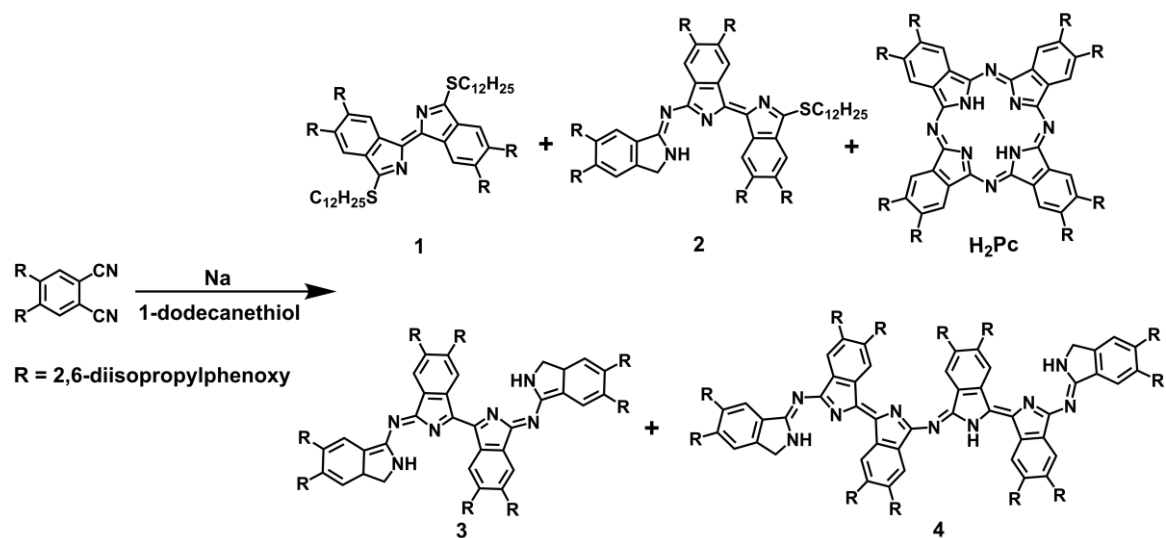

**Scheme S1** Synthesis of linear oligoisoindole compounds **1-4** along with the cyclic tetraisoindole Pc.



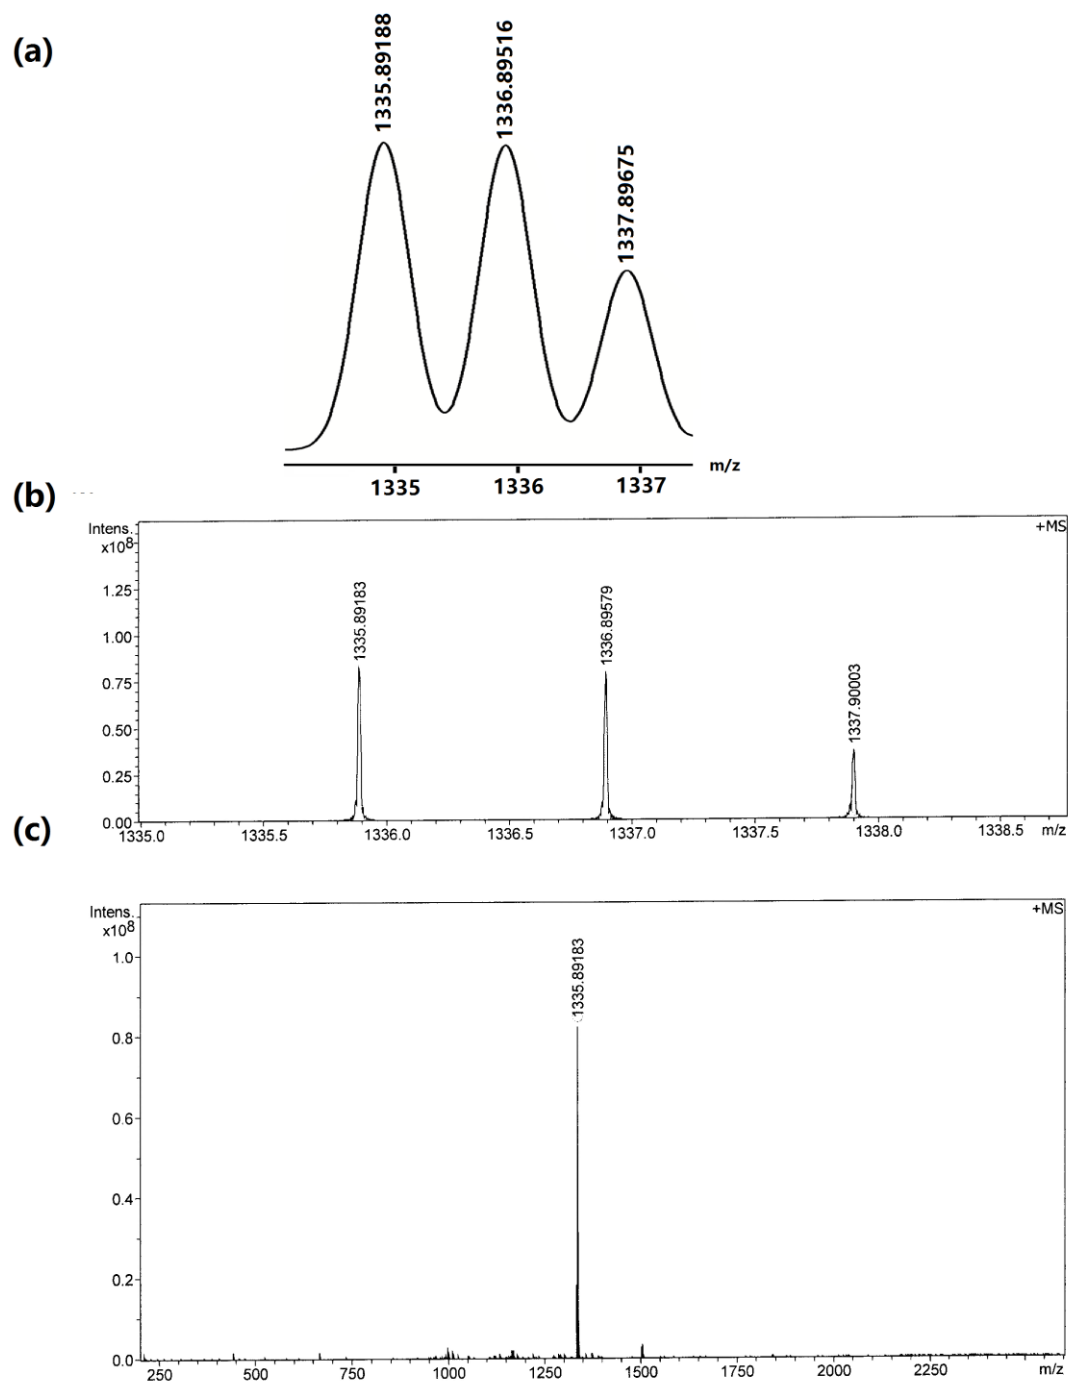

**Fig. S1** Simulated (a) and experimental isotopic (b) pattern of  $[M+H]^+$  and HR MS (c) for **1**.

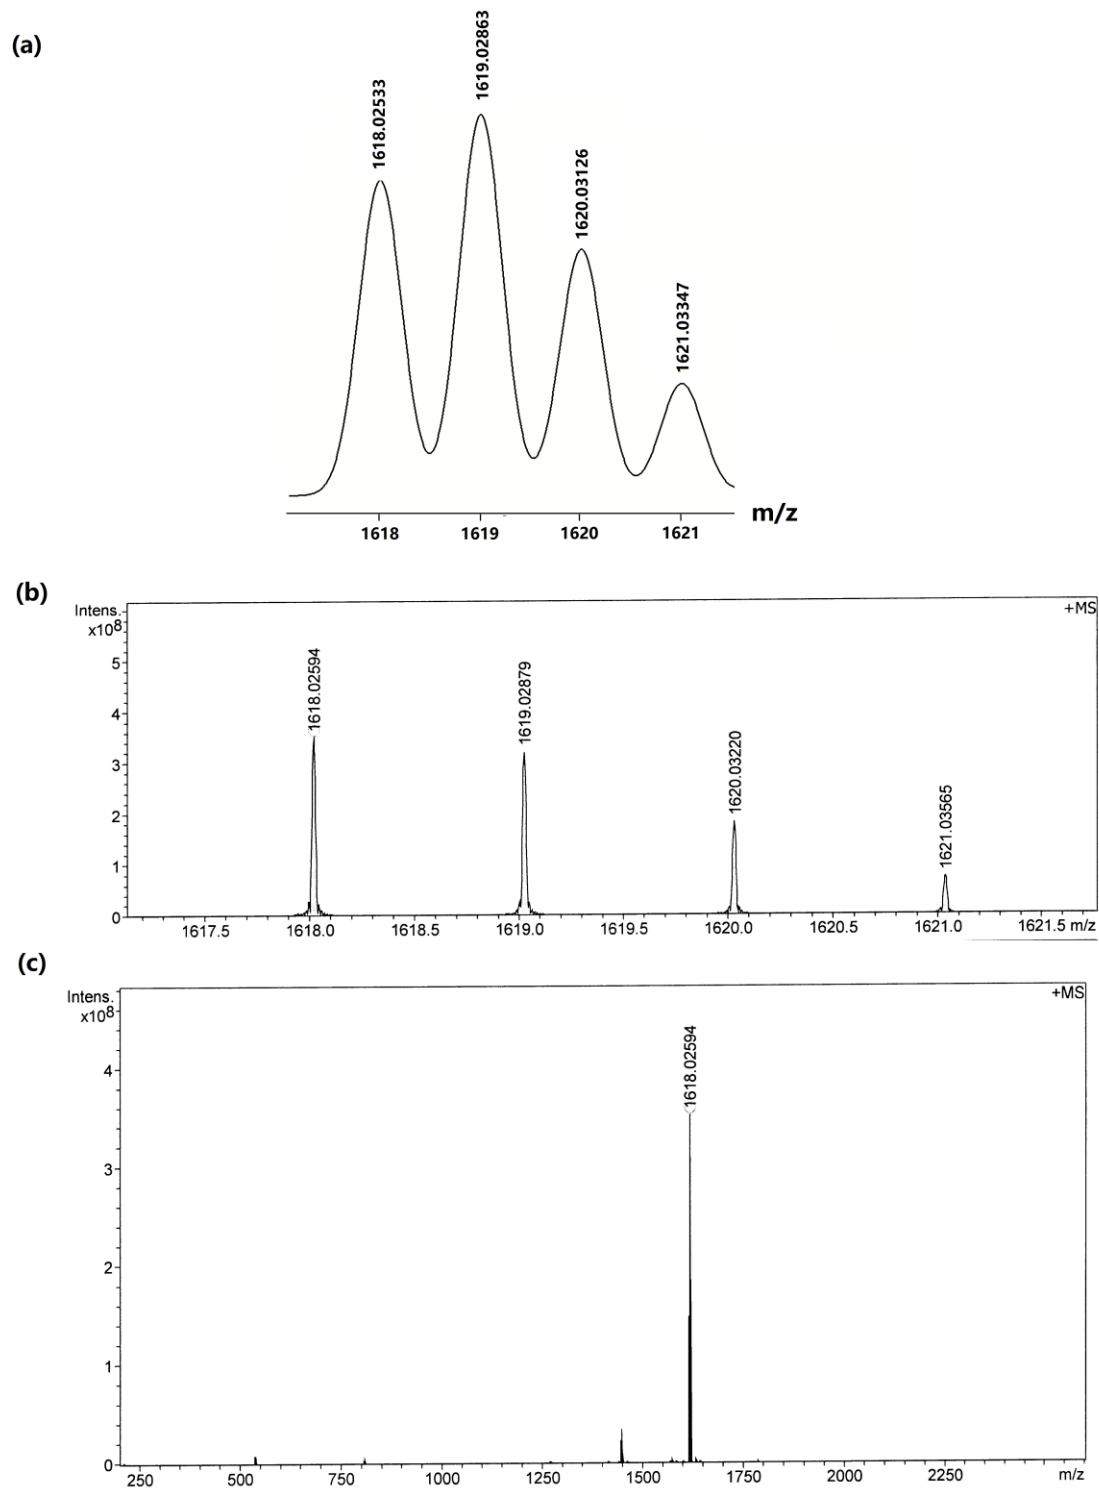

**Fig. S2** Simulated (a) and experimental isotopic (b) pattern of  $[M+H]^+$  and HR MS (c) for **2**.

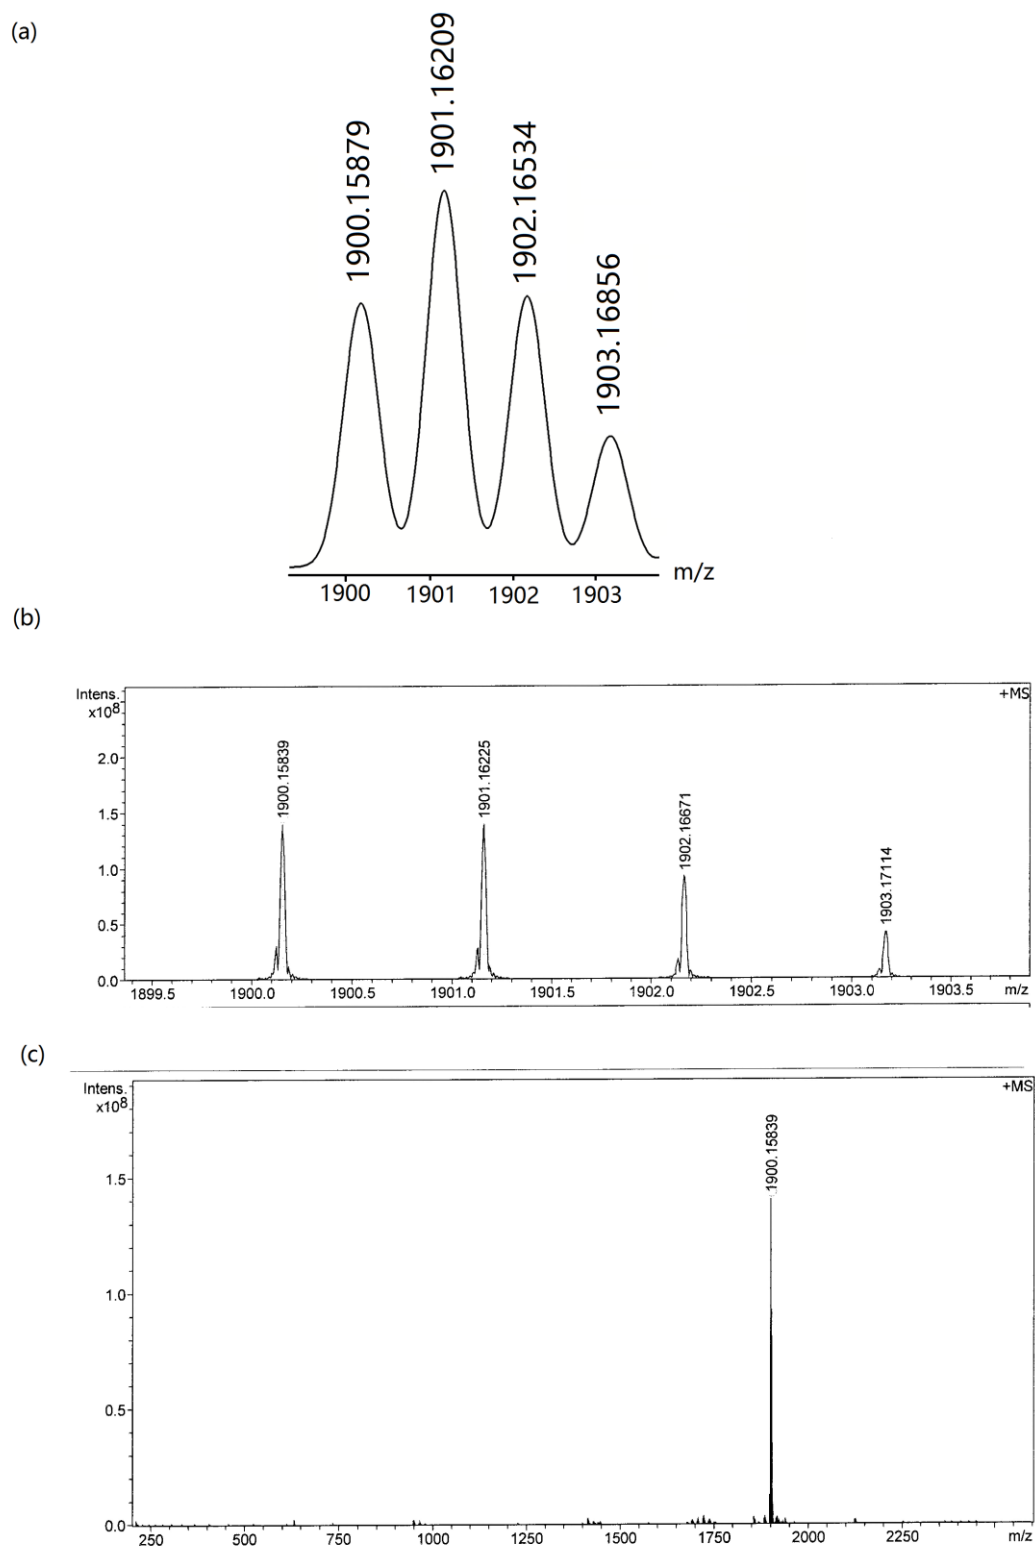

**Fig. S3** Simulated (a) and experimental isotopic (b) pattern of  $[M-H]^+$  and HR MS (c) for **3**.

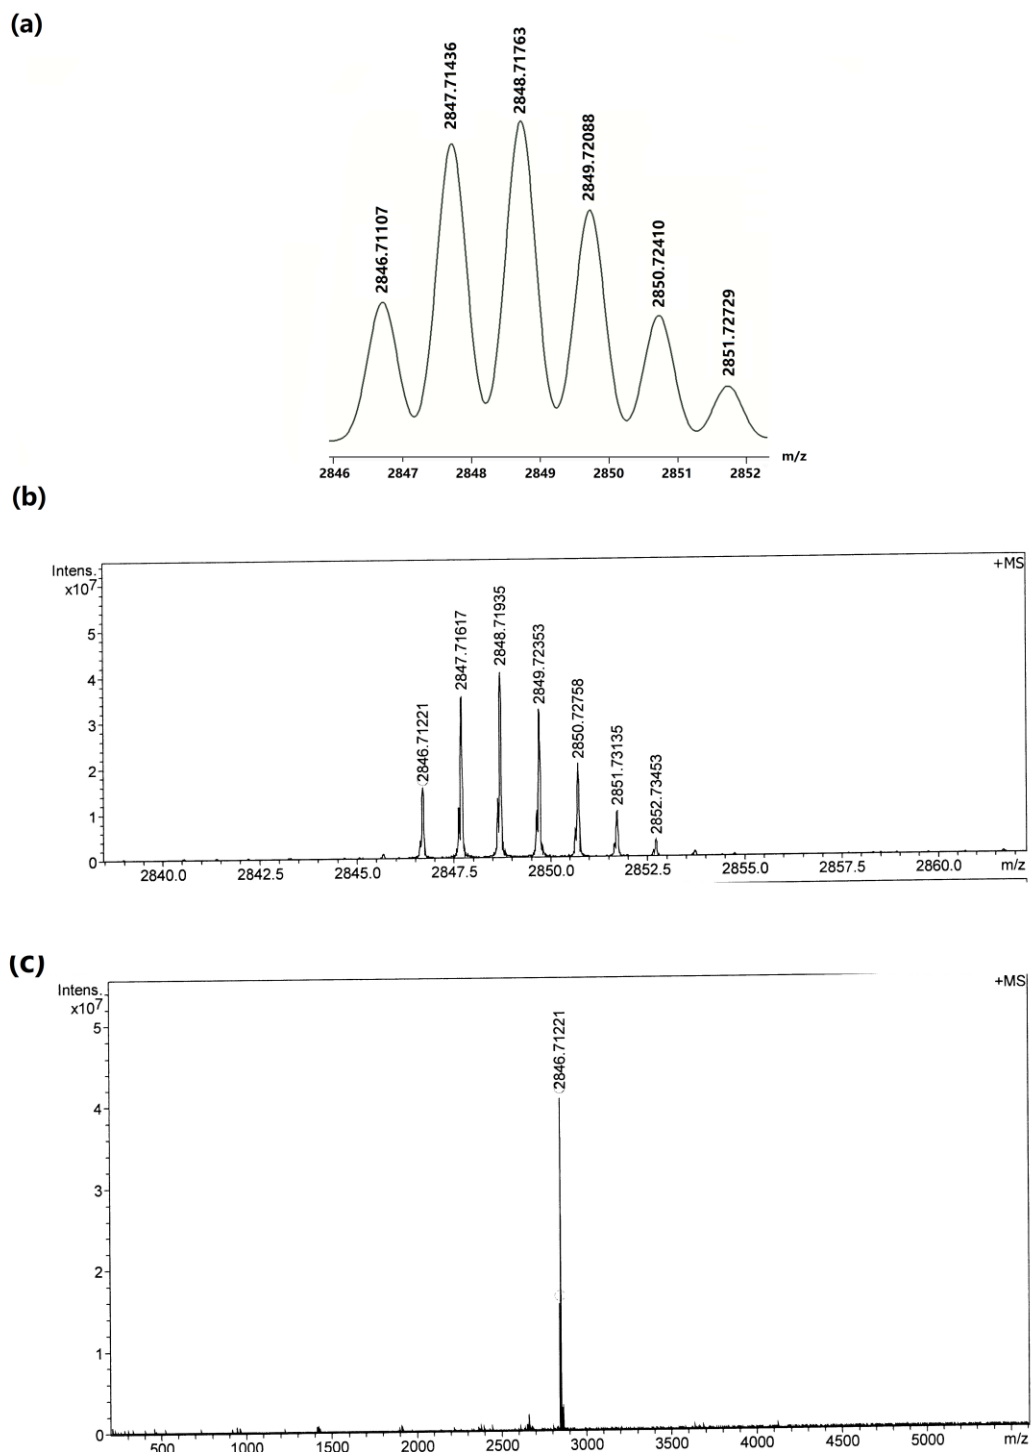

**Fig. S4** Simulated (a) and experimental isotopic (b) pattern of  $[M]^+$  and HR MS (c) for **4**.

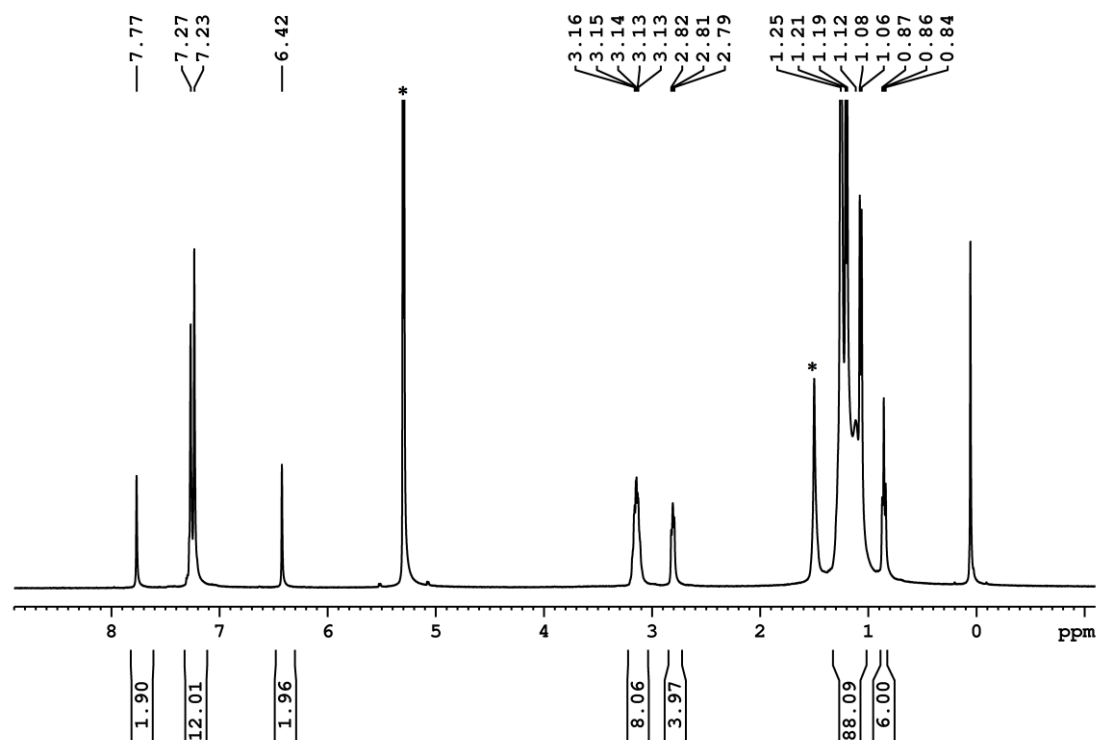

**Fig. S5**  $^1\text{H}$  NMR spectrum of **1** in  $\text{CD}_2\text{Cl}_2$  at 298K; \* indicates the signals for residual solvents.

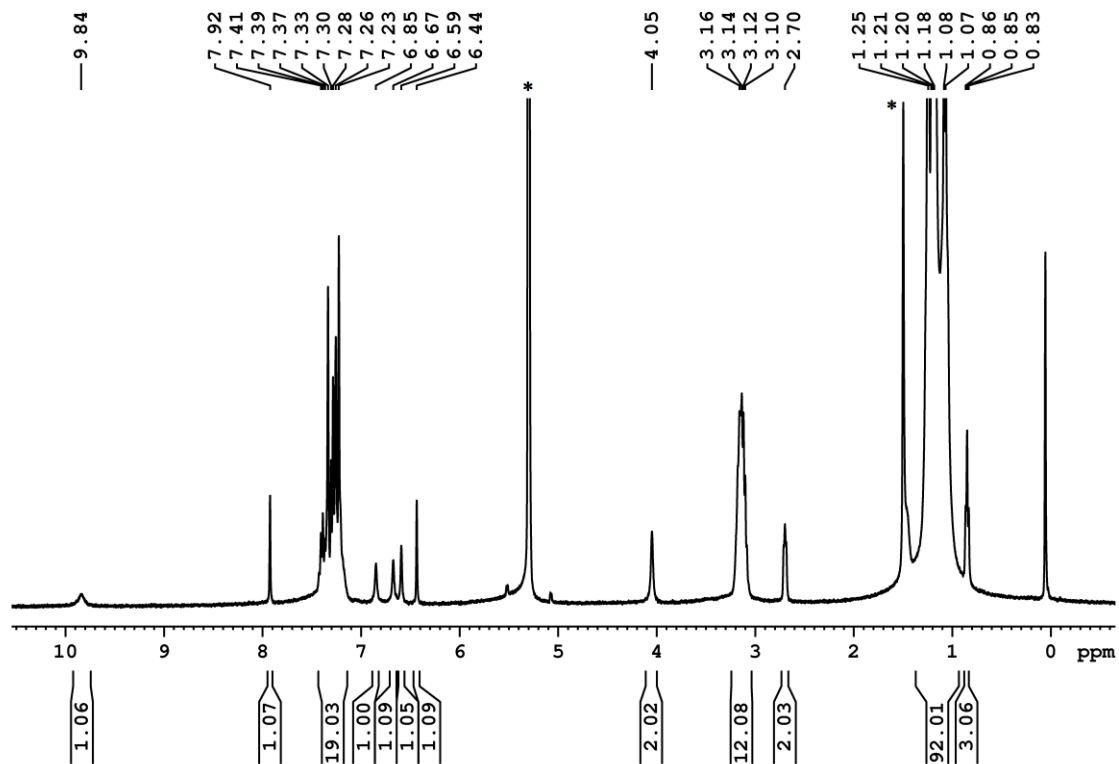

**Fig. S6**  $^1\text{H}$  NMR spectrum of **2** in  $\text{CD}_2\text{Cl}_2$  at 298K; \* indicates the signals for residual solvents.

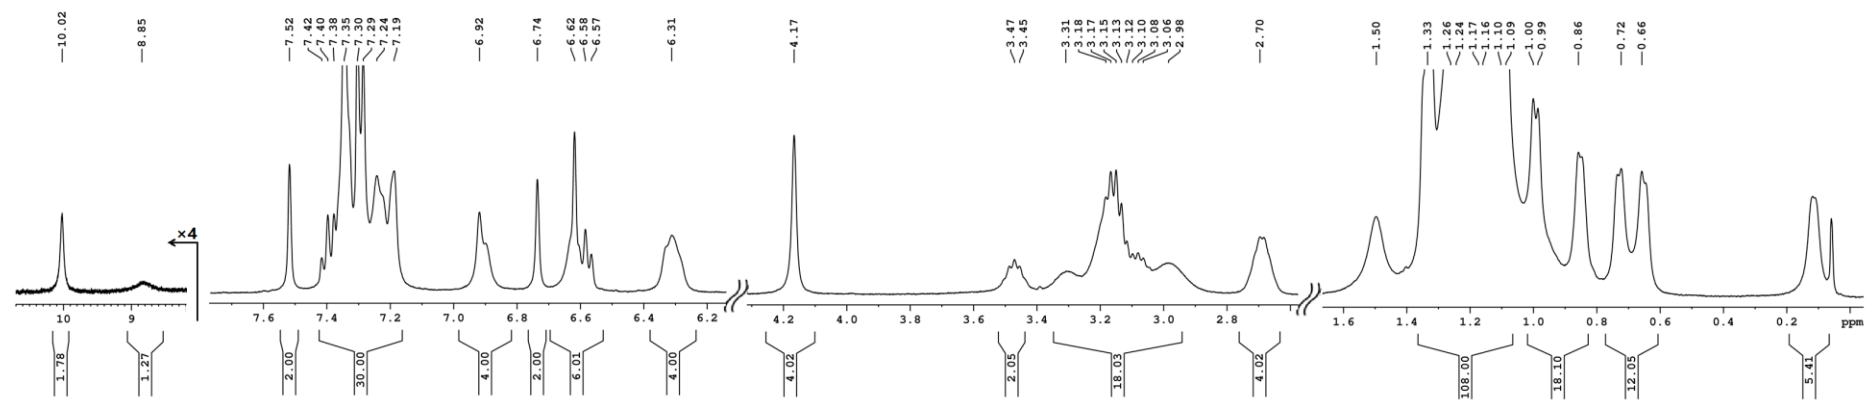

**Fig. S7**  $^1\text{H}$  NMR spectrum of **4** in  $\text{CD}_2\text{Cl}_2$  at 298K; \* indicates the signals for residual solvents.

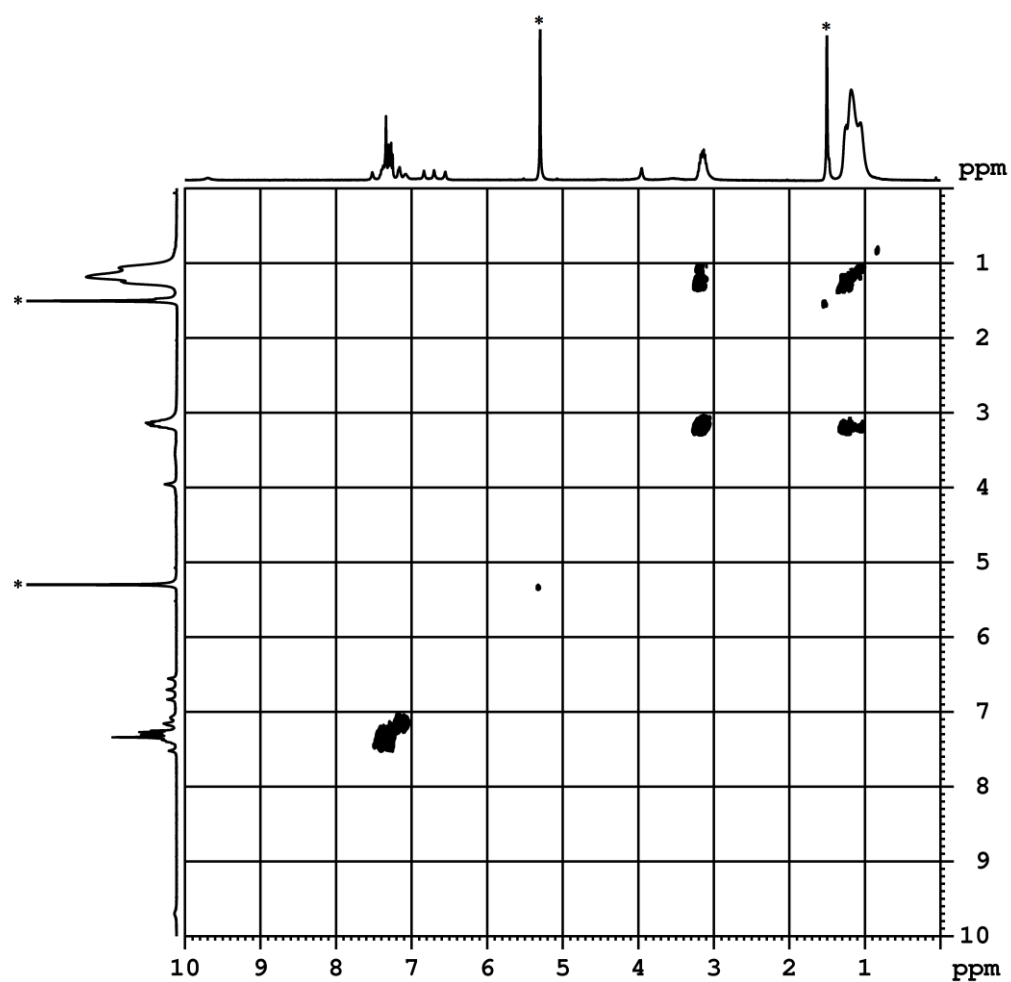

**Fig. S8**  $^1\text{H}$ - $^1\text{H}$  COSY spectrum of compound **3** in  $\text{CD}_2\text{Cl}_2$  at 298K. \* indicates the signals of residual solvent.



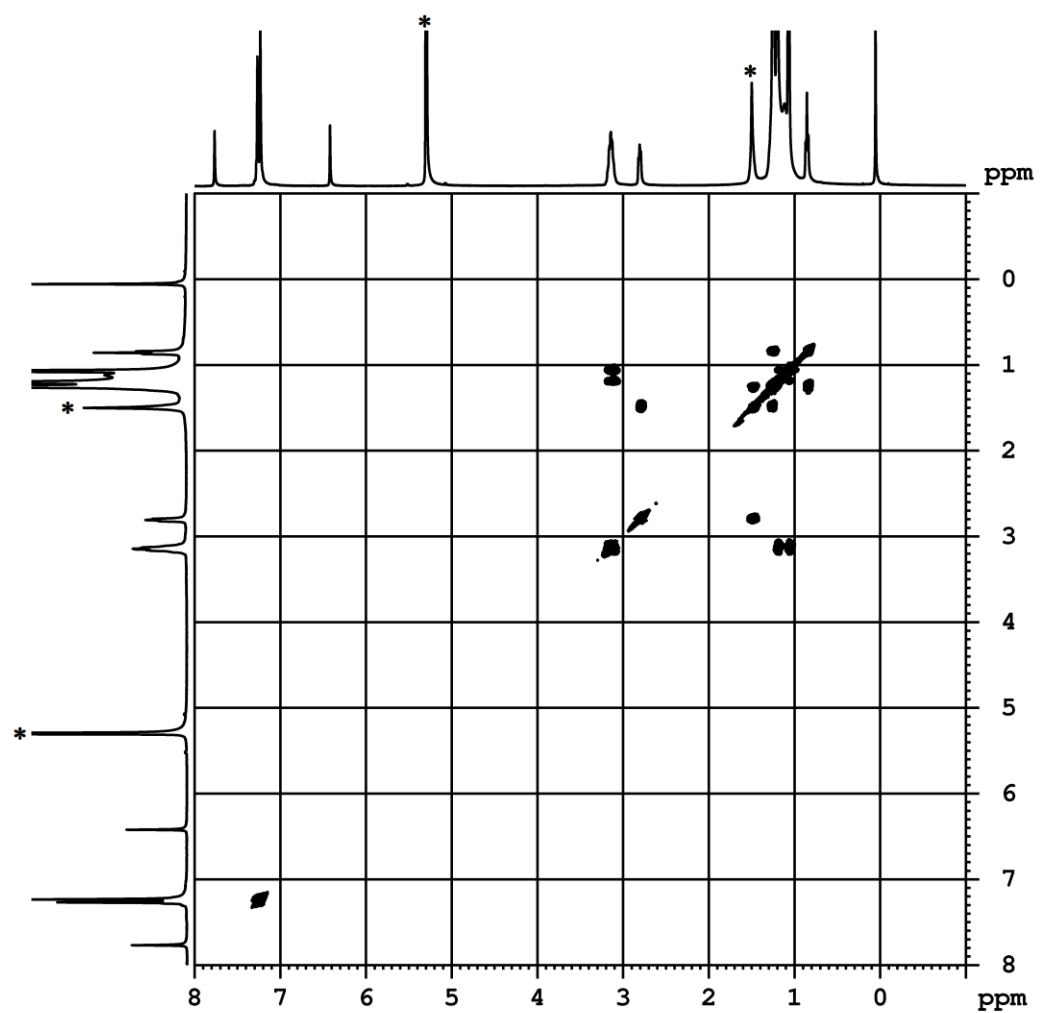

**Fig. S9**  $^1\text{H}$ - $^1\text{H}$  COSY spectrum of compound **1** in  $\text{CD}_2\text{Cl}_2$  at 298K. \* indicates the signals of residual solvent.

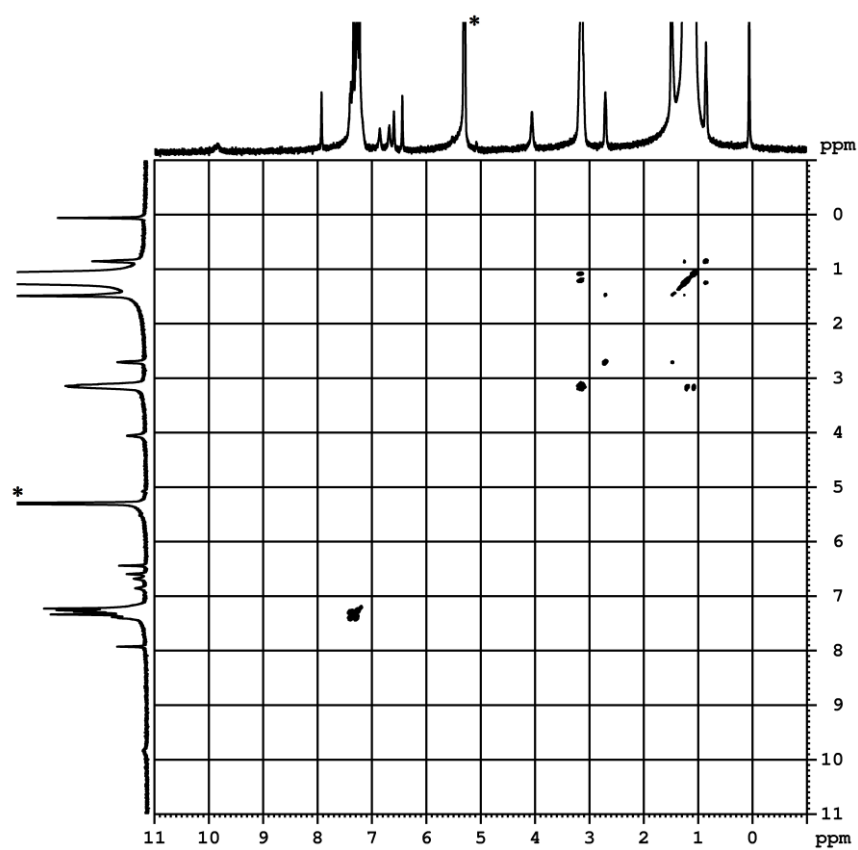

**Fig. S10**  $^1\text{H}$ - $^1\text{H}$  COSY spectrum of compound **2** in  $\text{CD}_2\text{Cl}_2$  at 298K. \* indicates the signals of residual solvent.

No coupling signals between the protons from the terminal carbon atoms and the N-H proton from the outer isoindole unit.

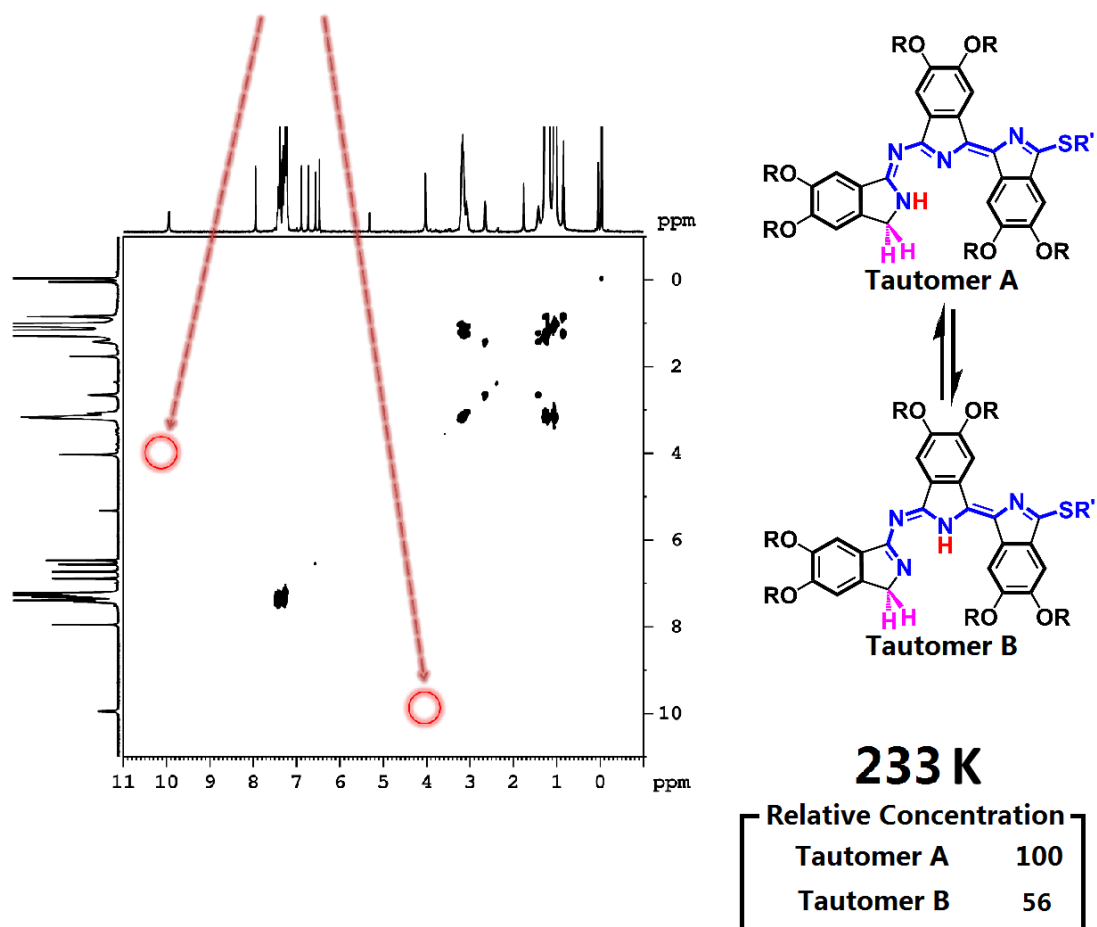

**Fig. S11**  $^1\text{H}$ - $^1\text{H}$  COSY spectrum of compound **2** in  $\text{CDCl}_3$  at 233 K.

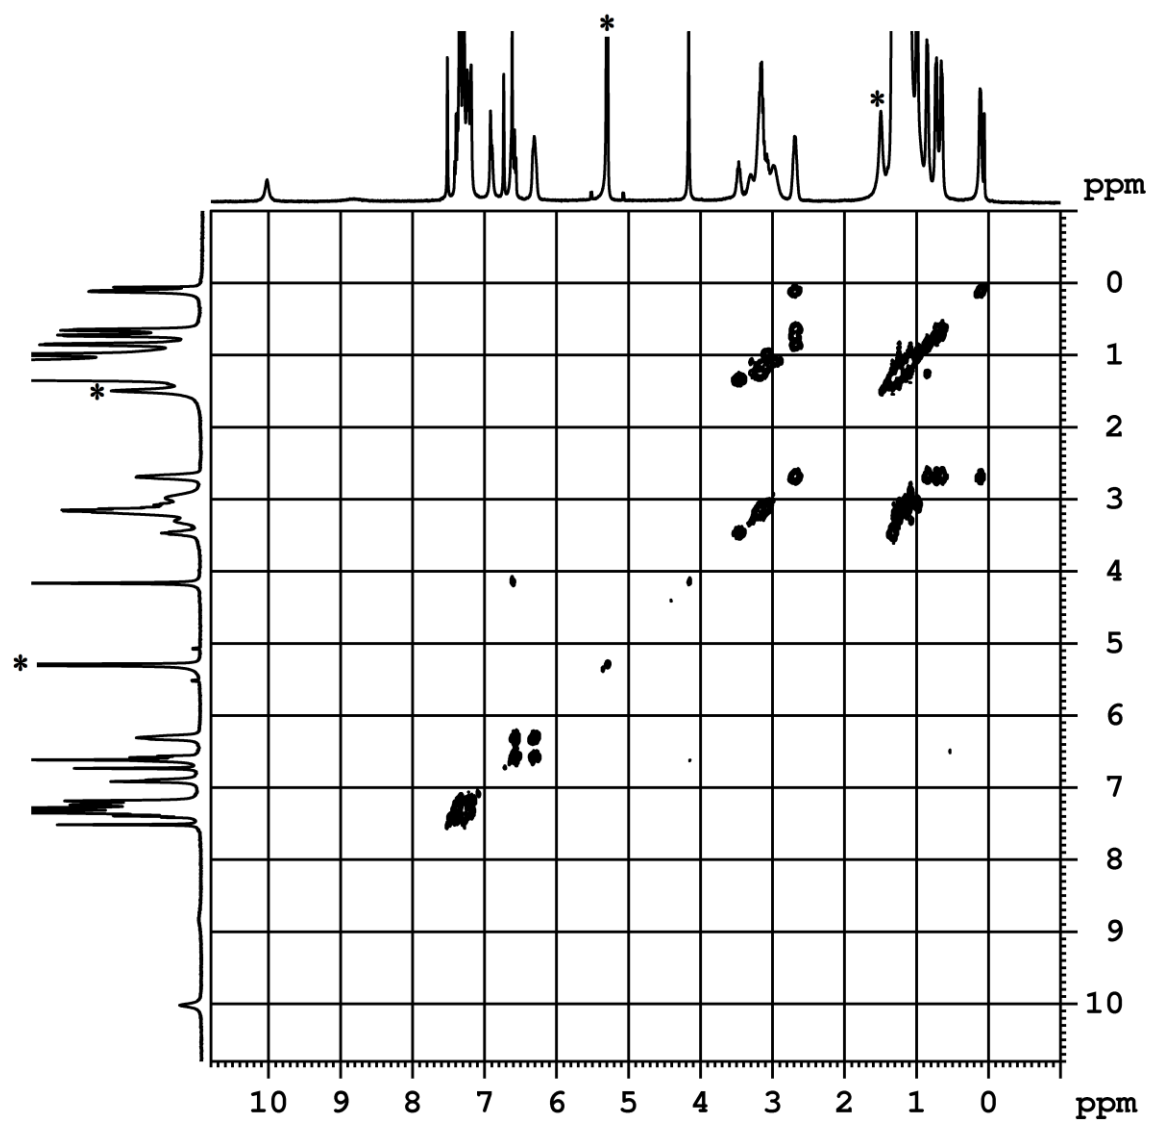

**Fig. S12**  $^1\text{H}$ - $^1\text{H}$  COSY spectrum of compound **4** in  $\text{CD}_2\text{Cl}_2$  at 298 K.

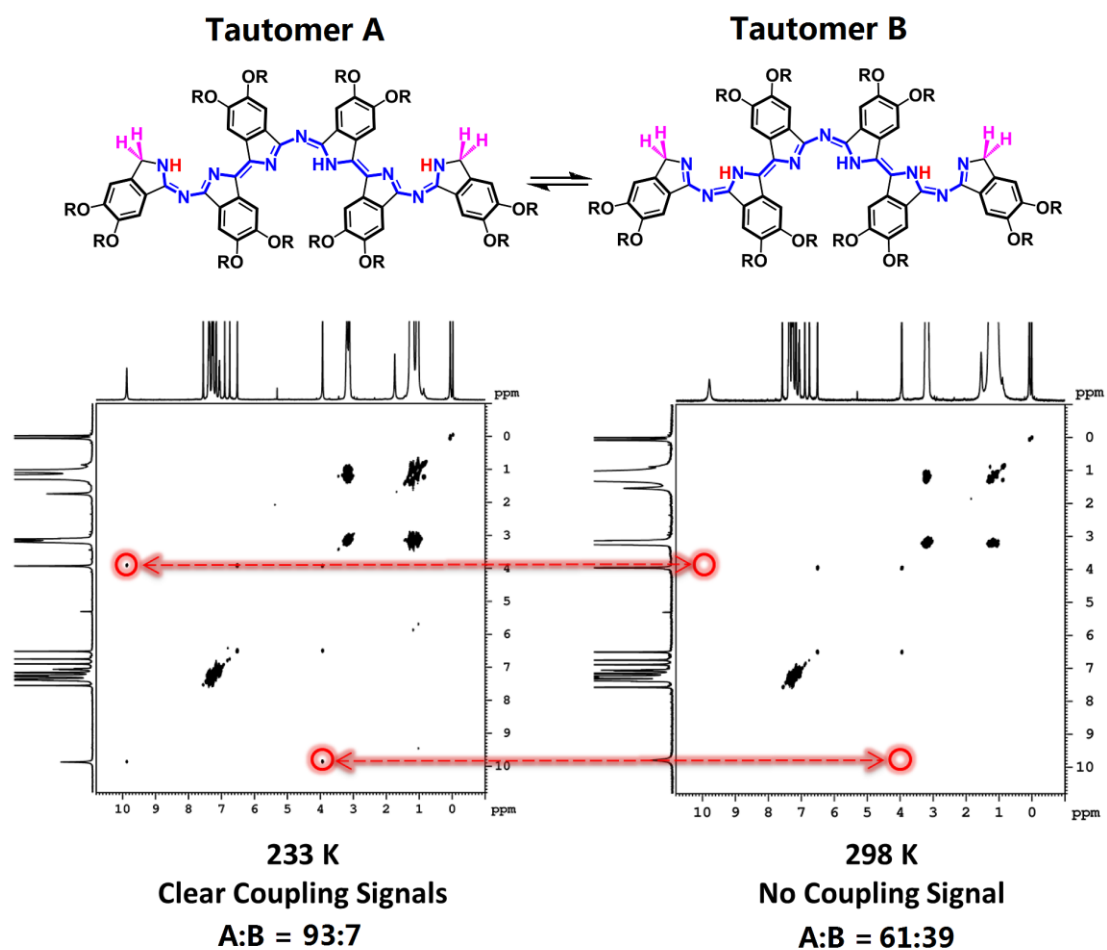

**Fig. S13** Comparison of the  $^1\text{H}$ - $^1\text{H}$  COSY spectra of **4** in  $\text{CD}_2\text{Cl}_2$  recorded at 233 and 298 K.

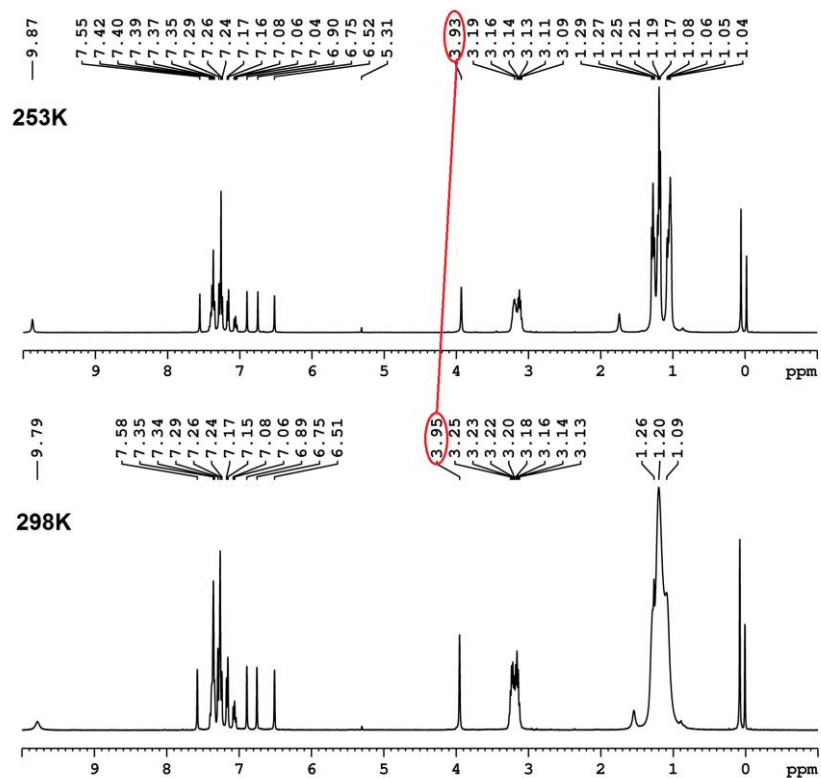

**Fig. S14** Comparison of the  $^1\text{H}$  NMR spectra of **3** in  $\text{CDCl}_3$  recorded at 253 and 298 K.

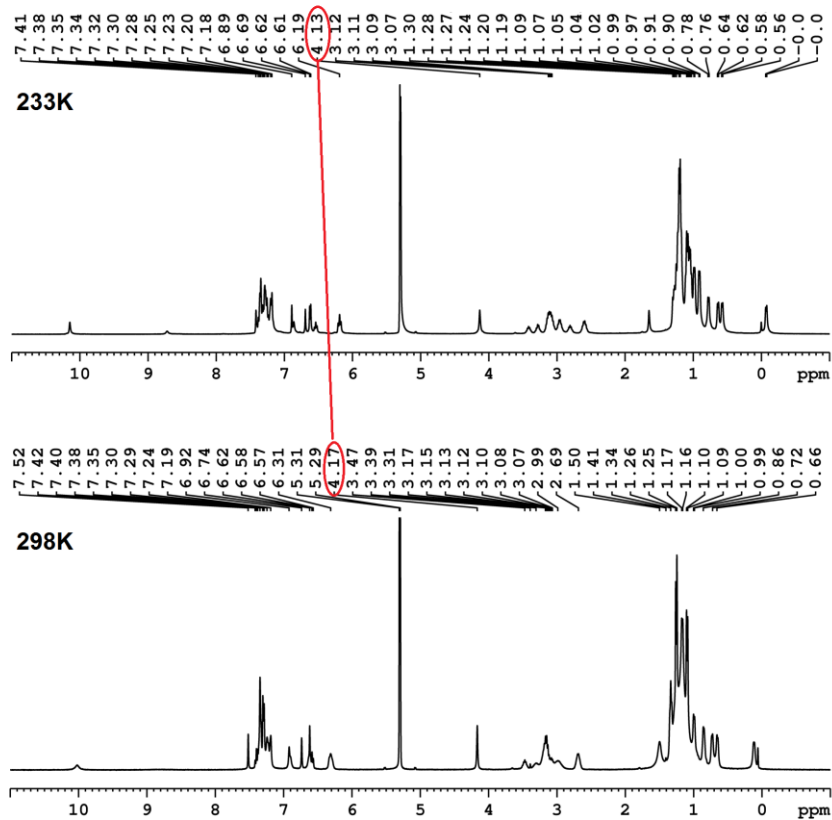

**Fig. S15** Comparison of the  $^1\text{H}$  NMR spectra of **4** in  $\text{CDCl}_3$  recorded at 233 and 298 K.

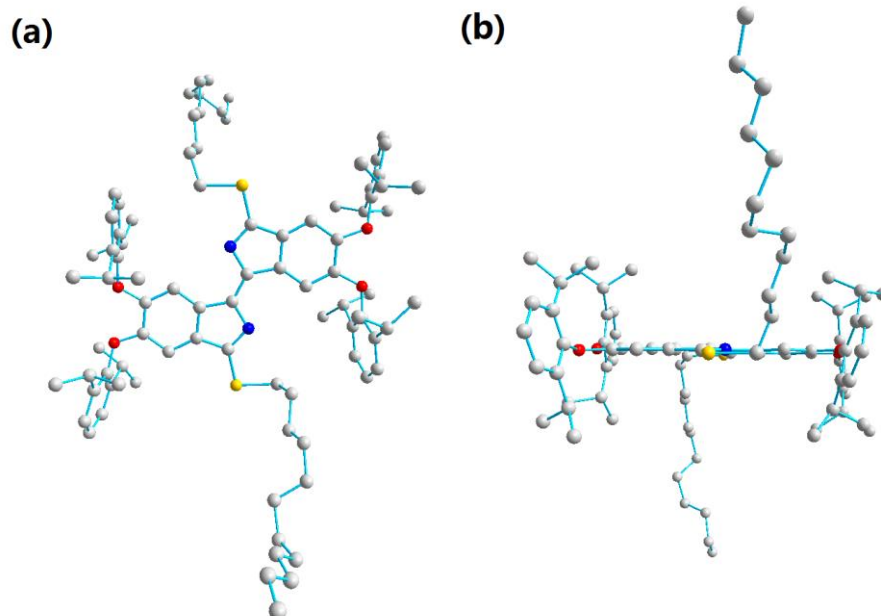

**Fig. S16** Molecular structure of **1** in top view (a) and side view (b). Hydrogen atoms are omitted for clarity (C grey, N blue, O red, and S yellow).



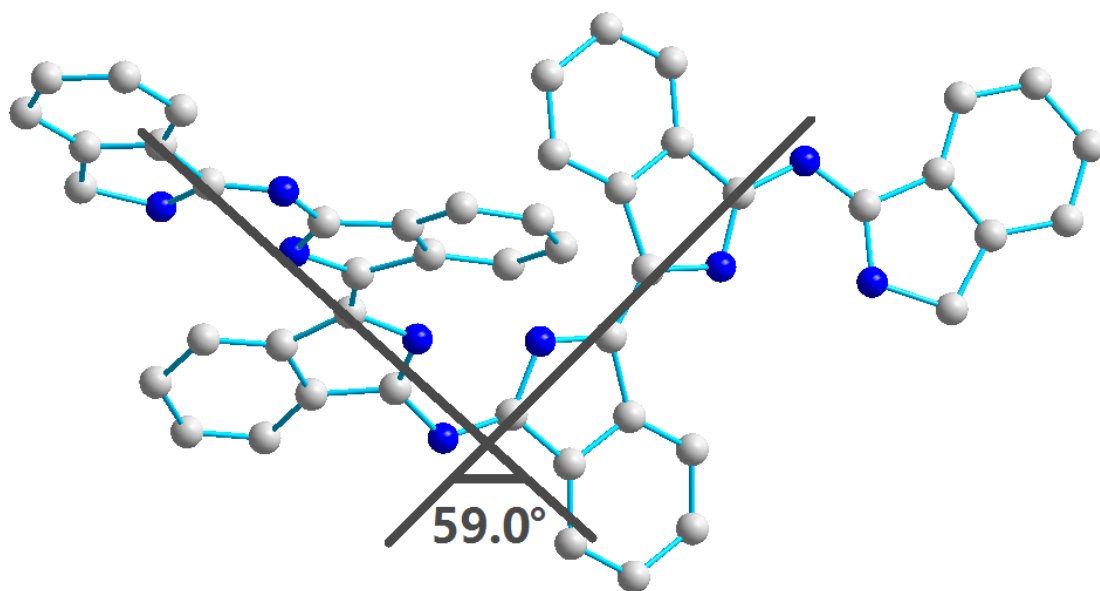

**Fig. S17** The dihedral angle of the two mean planes in **4**. Substituents and hydrogen atoms are omitted for clarity (C grey and N blue).

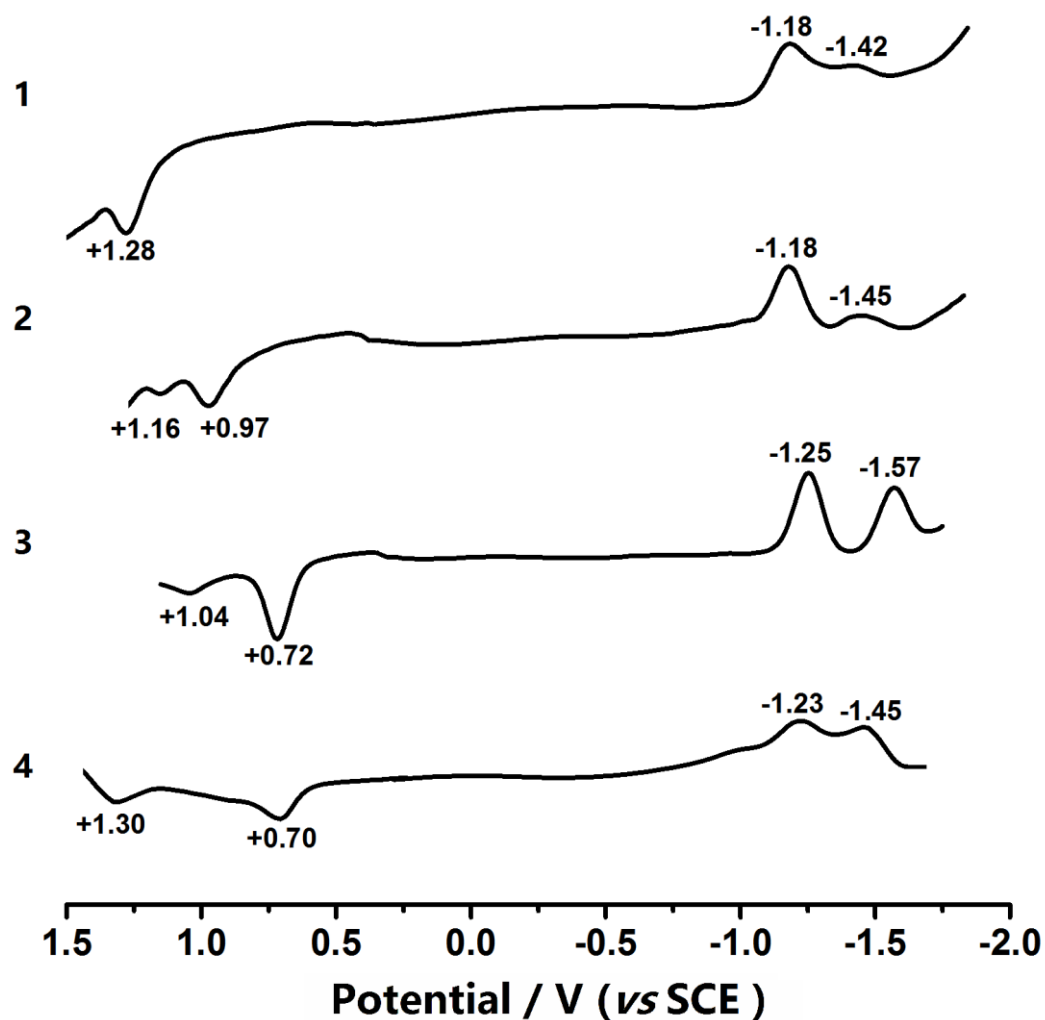

**Fig. S18** Differential pulse voltammograms (DPV) for **1-4** in  $\text{CH}_2\text{Cl}_2$  containing  $0.1 \text{ mol dm}^{-3} [\text{Bu}_4\text{N}]^+[\text{ClO}_4]^-$  at a scan rate of  $20 \text{ mV s}^{-1}$  with  $\text{Ag}^+/\text{Ag}$  (a solution of  $0.01 \text{ M AgNO}_3$  and  $0.1 \text{ M TBAP}$  in acetonitrile) as the reference electrode. It was corrected for junction potentials by being referenced internally to the ferrocenium/ferrocene ( $\text{Fc}^+/\text{Fc}$ ) couple [ $E_{1/2}(\text{Fc}^+/\text{Fc}) = 0.501 \text{ V vs. SCE}$ ].

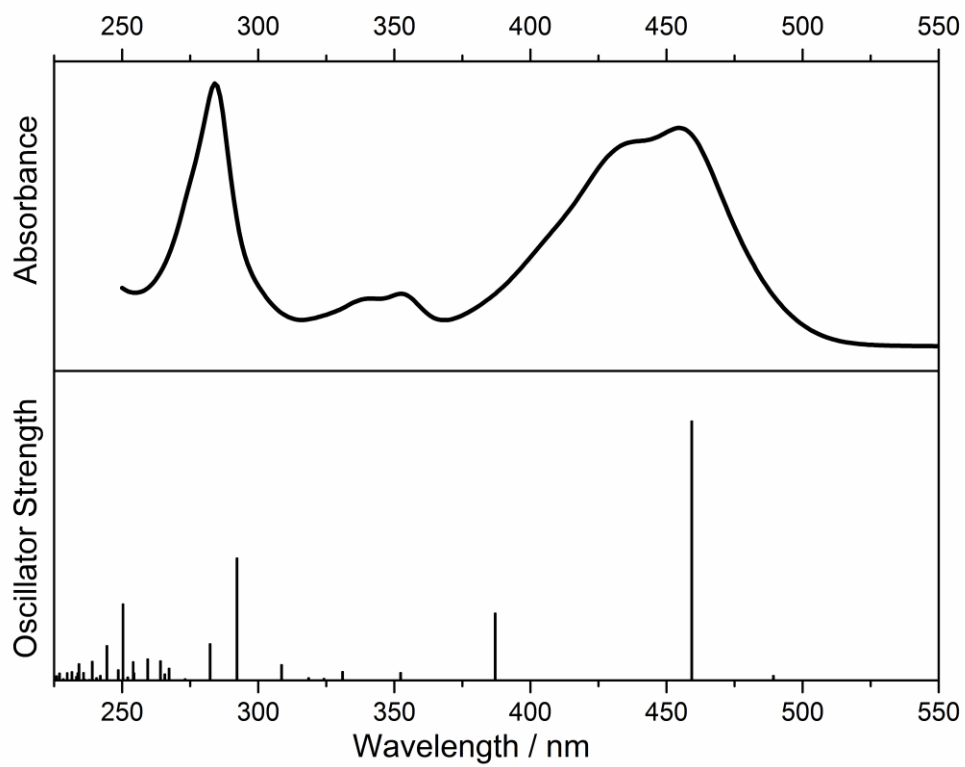

**Fig. S19** The experimental and simulated electronic absorption spectra for **1**.

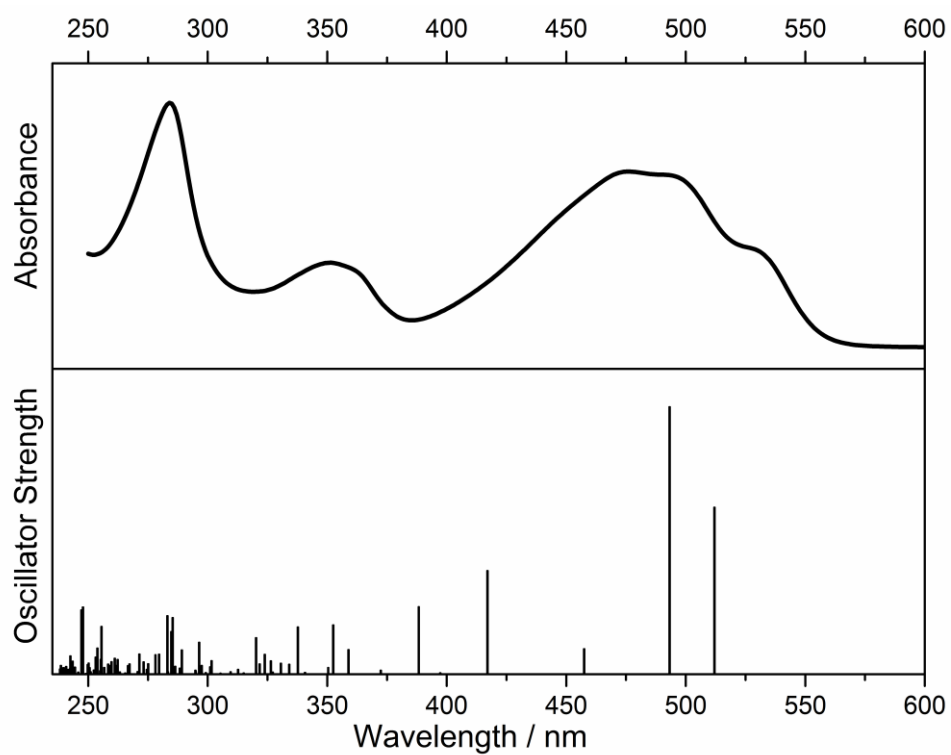

**Fig. S20** The experimental and simulated electronic absorption spectra for **2**.

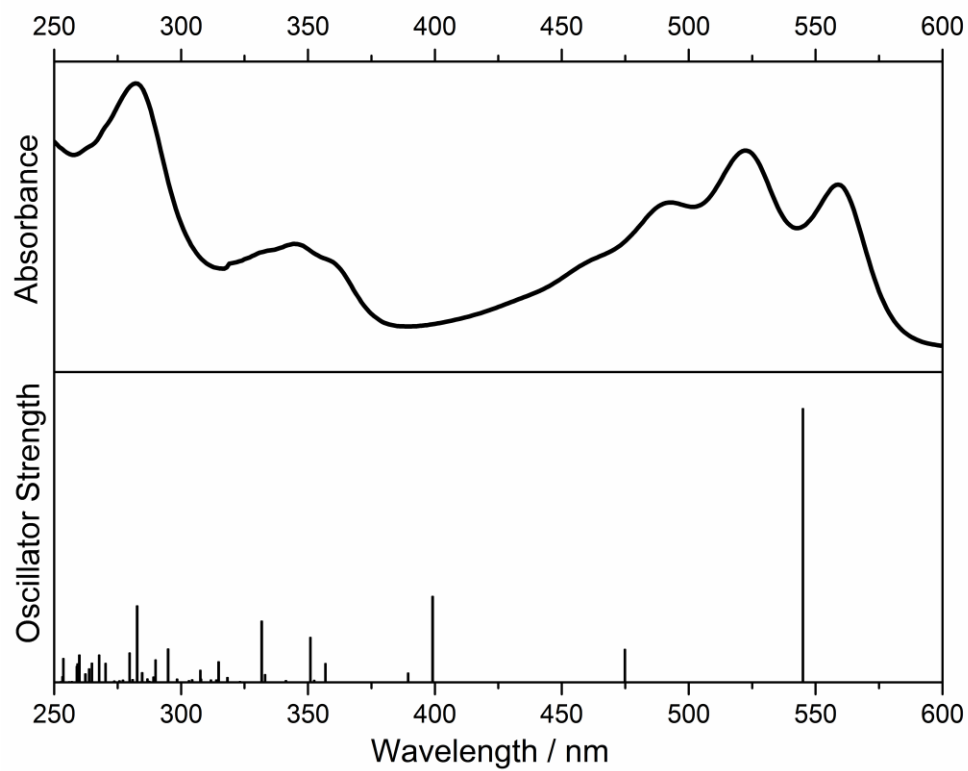

**Fig. S21** The experimental and simulated electronic absorption spectra for **3**.

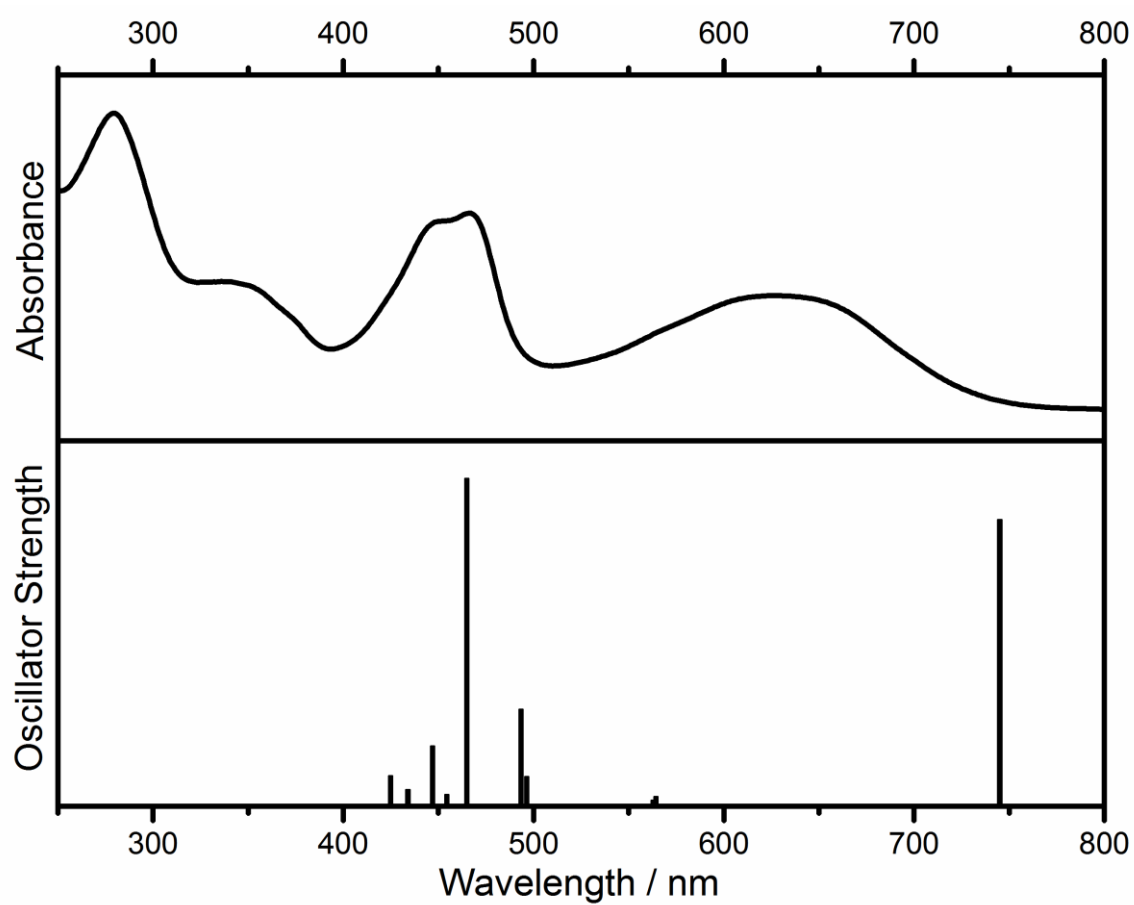

**Fig. S22** The experimental and simulated electronic absorption spectra for **4**.

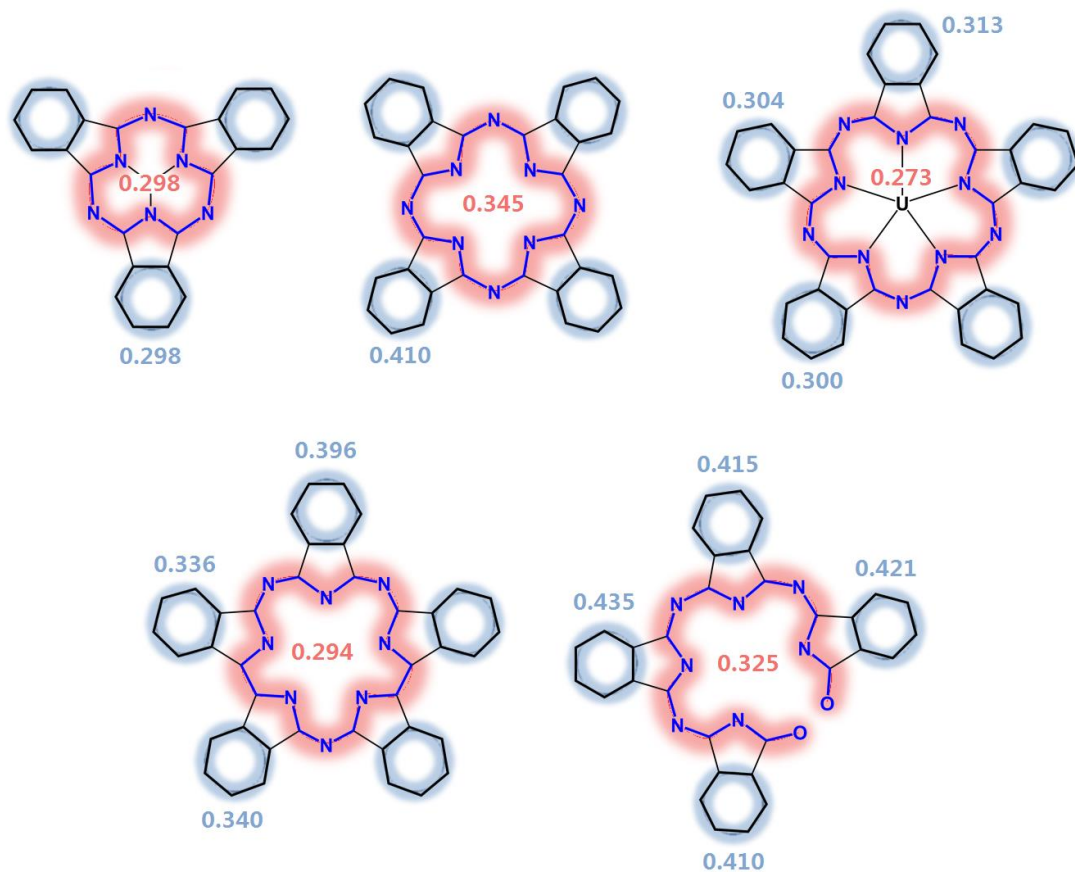

**Fig. S23** The average  $\pi$  bond orders of the linear and cyclic conjugated routes in traditional cyclic conjugated oligoisoindoles together with phthalocyanine ring-cleavage derivative.

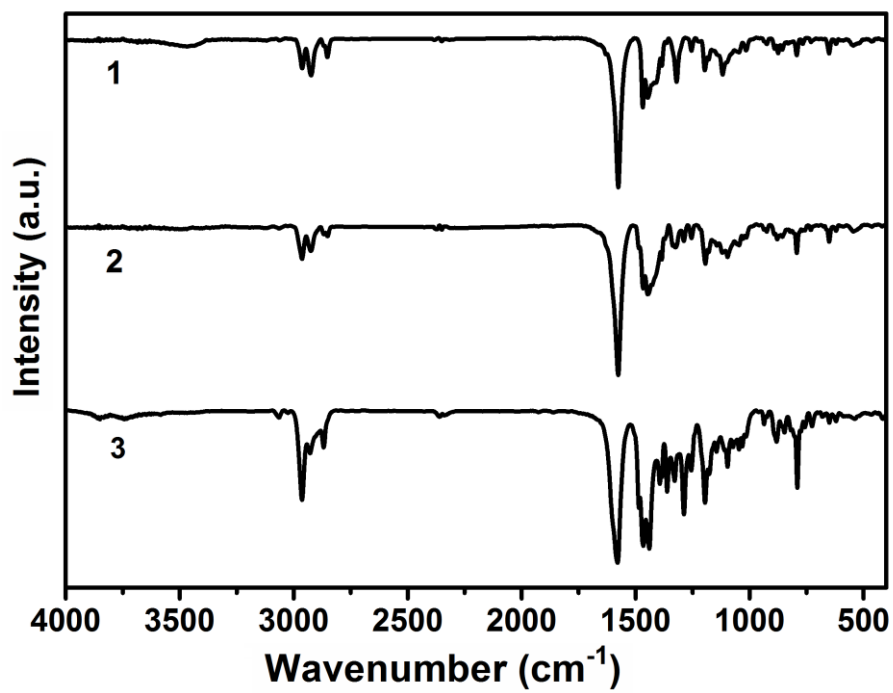

**Fig. S24** IR spectra of **1-3** in the region of 400-4000 cm<sup>-1</sup>.



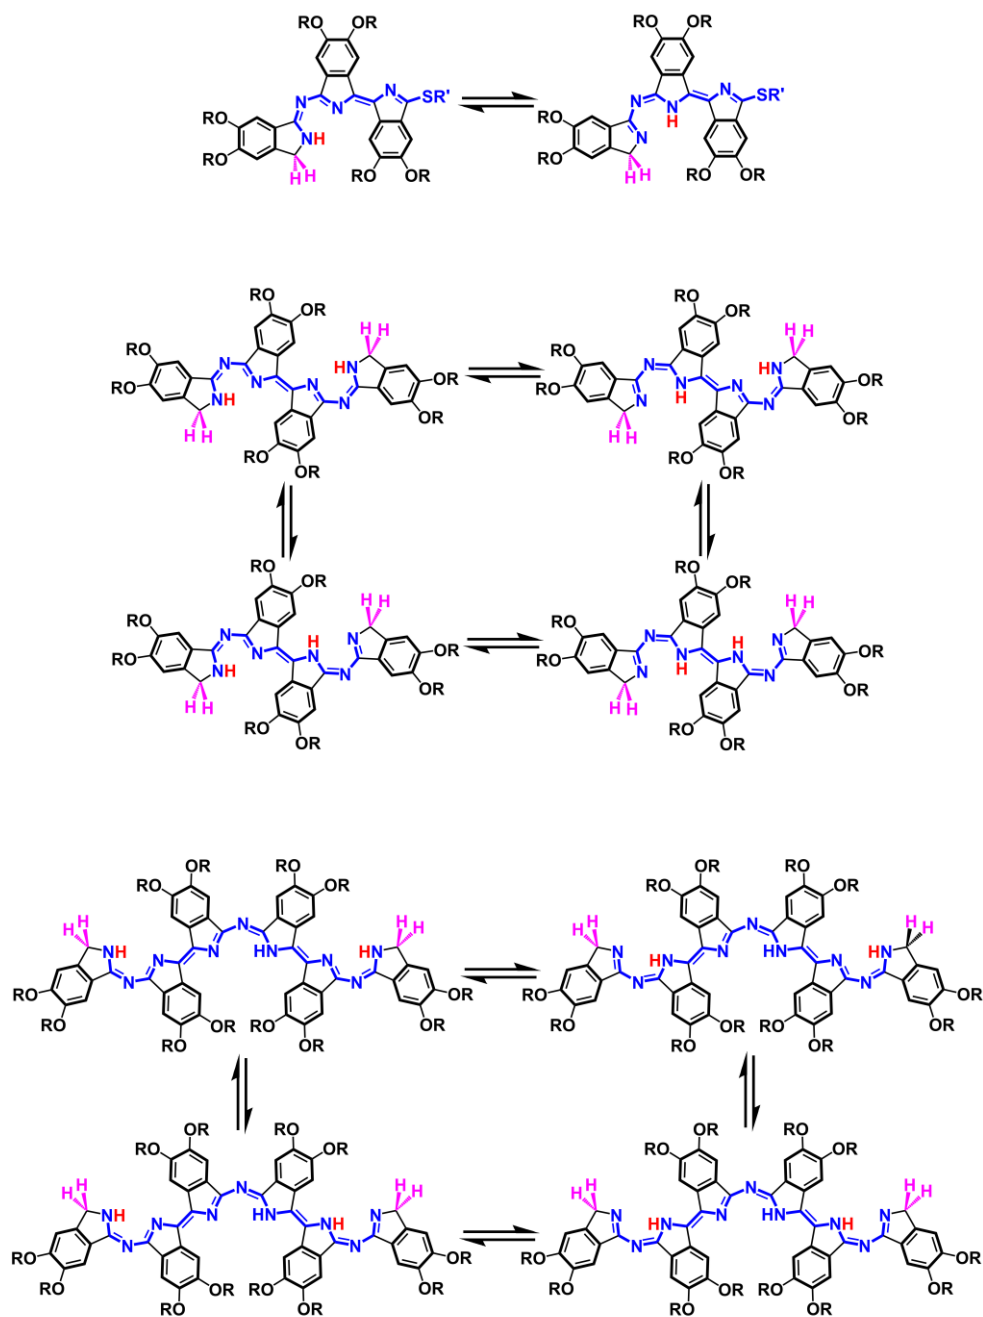

**Fig. S25** The tautomeric conformations for compounds 2-4.

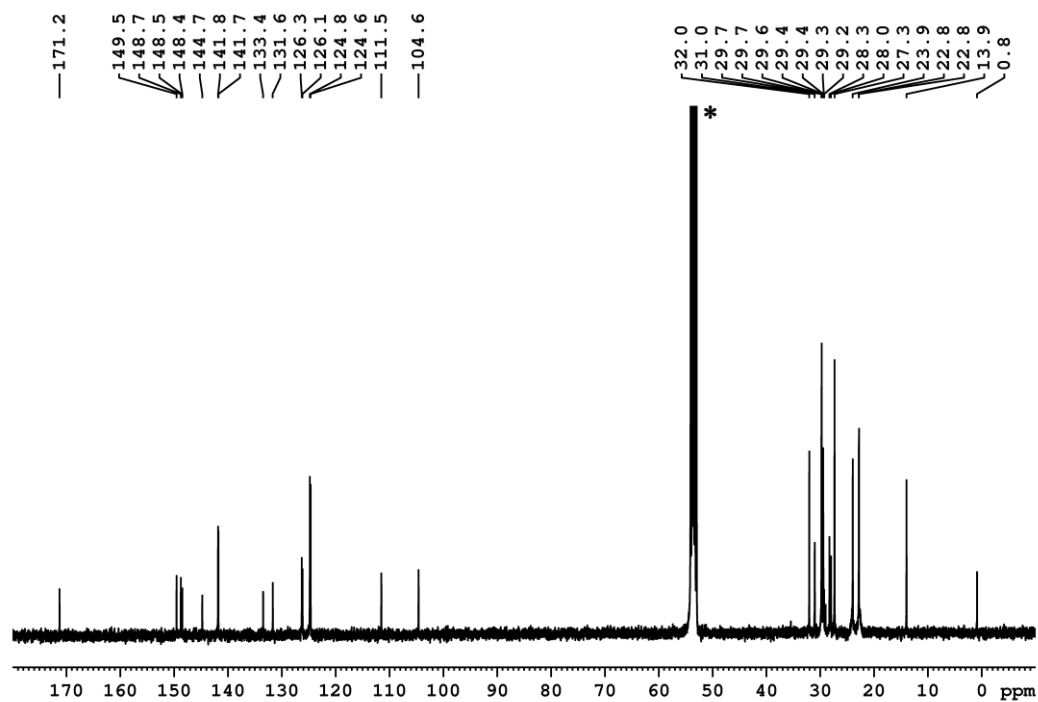

**Fig. S26**  $^{13}\text{C}$  NMR spectrum of compound **1** in  $\text{CDCl}_3$  at 298K. \* indicates the signals of residual solvent.

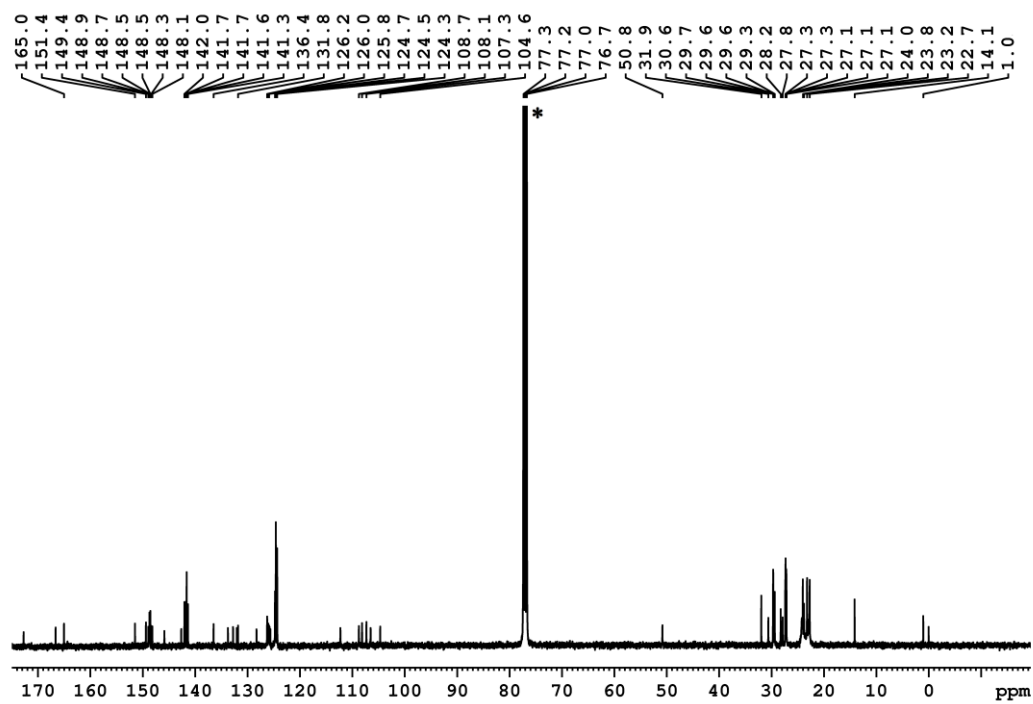

**Fig. S27**  $^{13}\text{C}$  NMR spectrum of compound **2** in  $\text{CDCl}_3$  at 298K. \* indicates the signals of residual solvent.

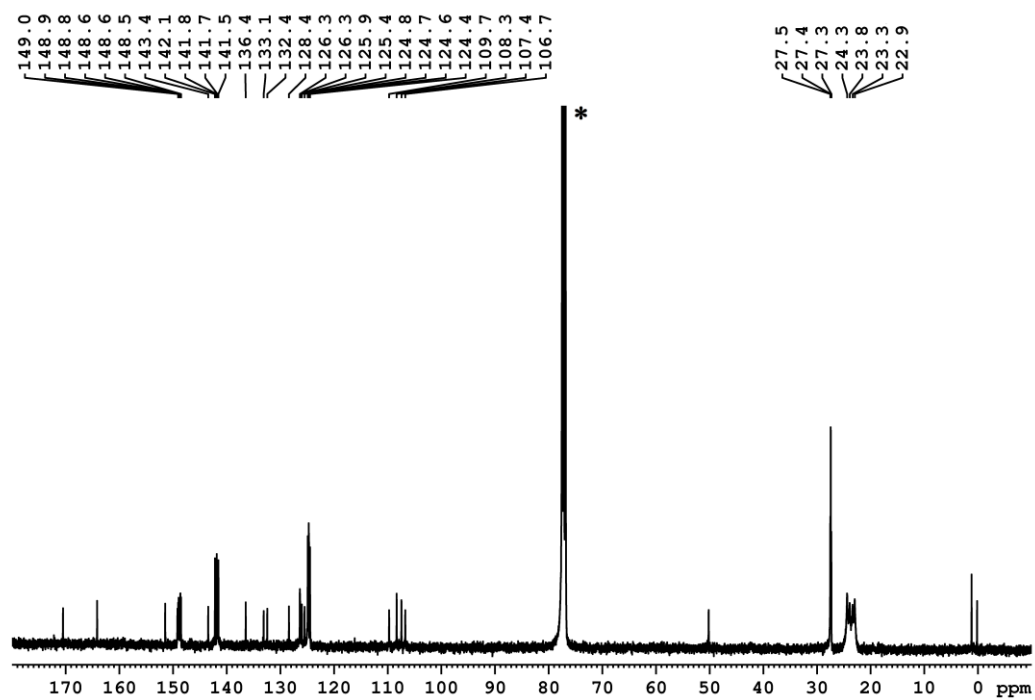

**Fig. S28**  $^{13}\text{C}$  NMR spectrum of compound **3** in  $\text{CDCl}_3$  at 298K. \* indicates the signals of residual solvent.

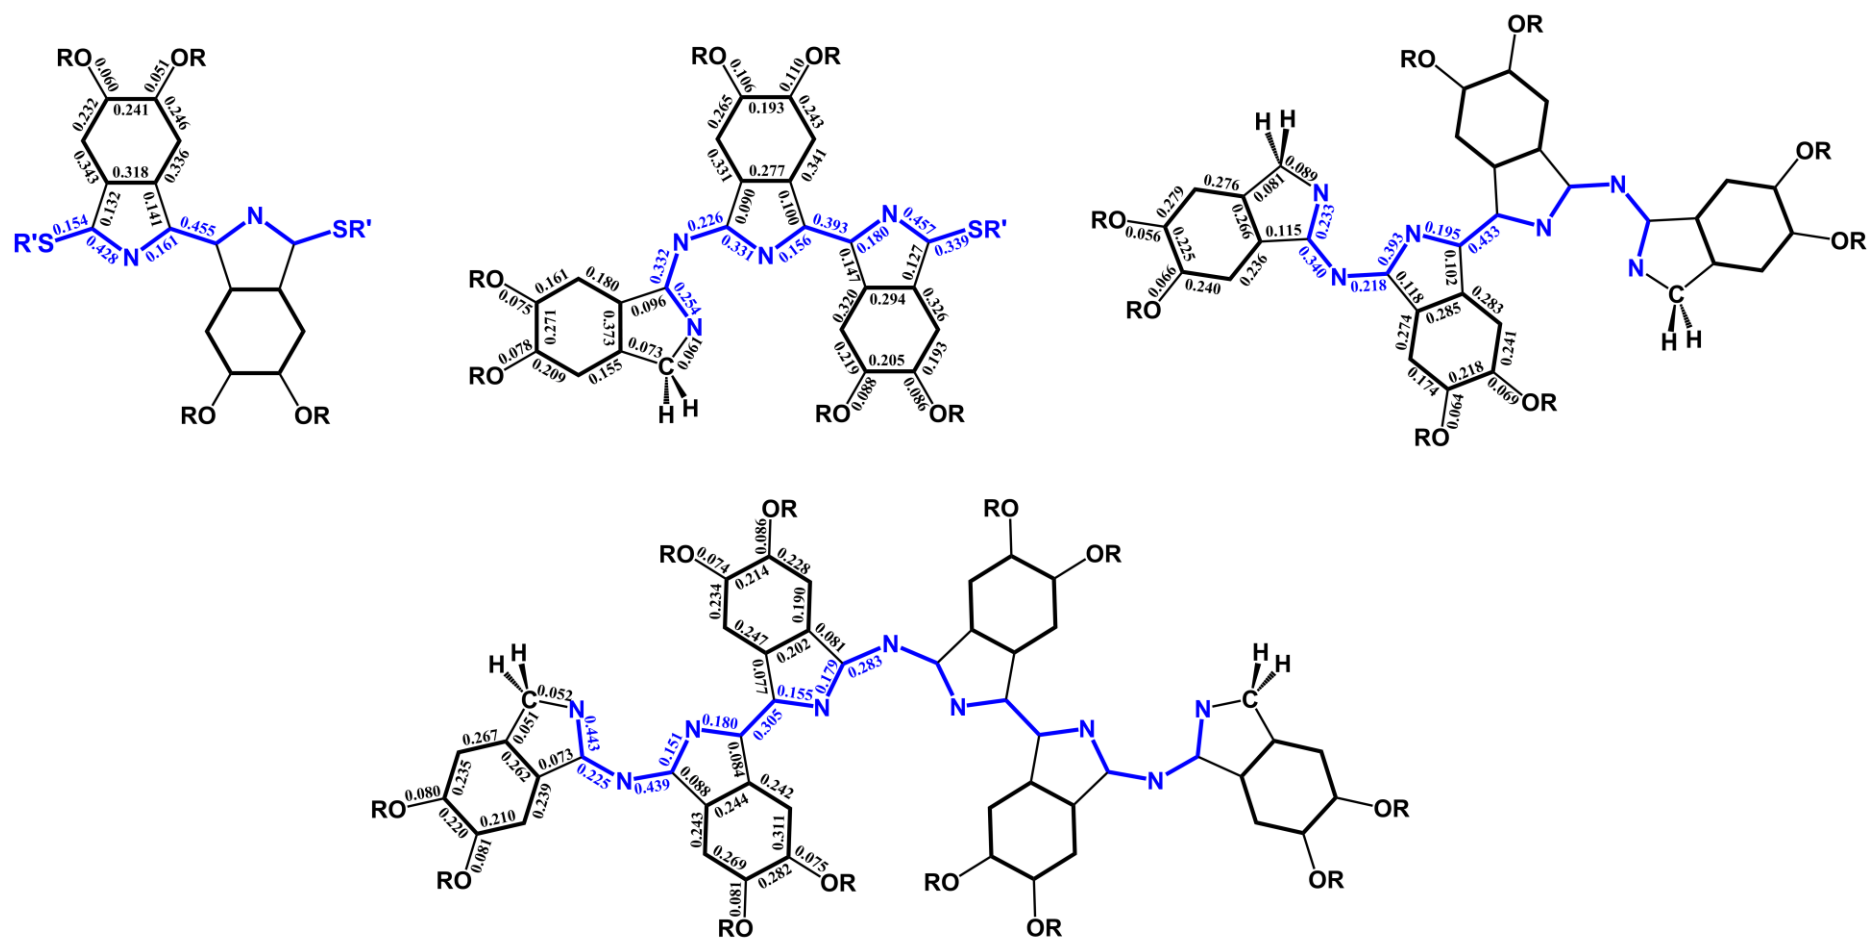

Fig. S29 The  $\pi$  MBO of 1-4.

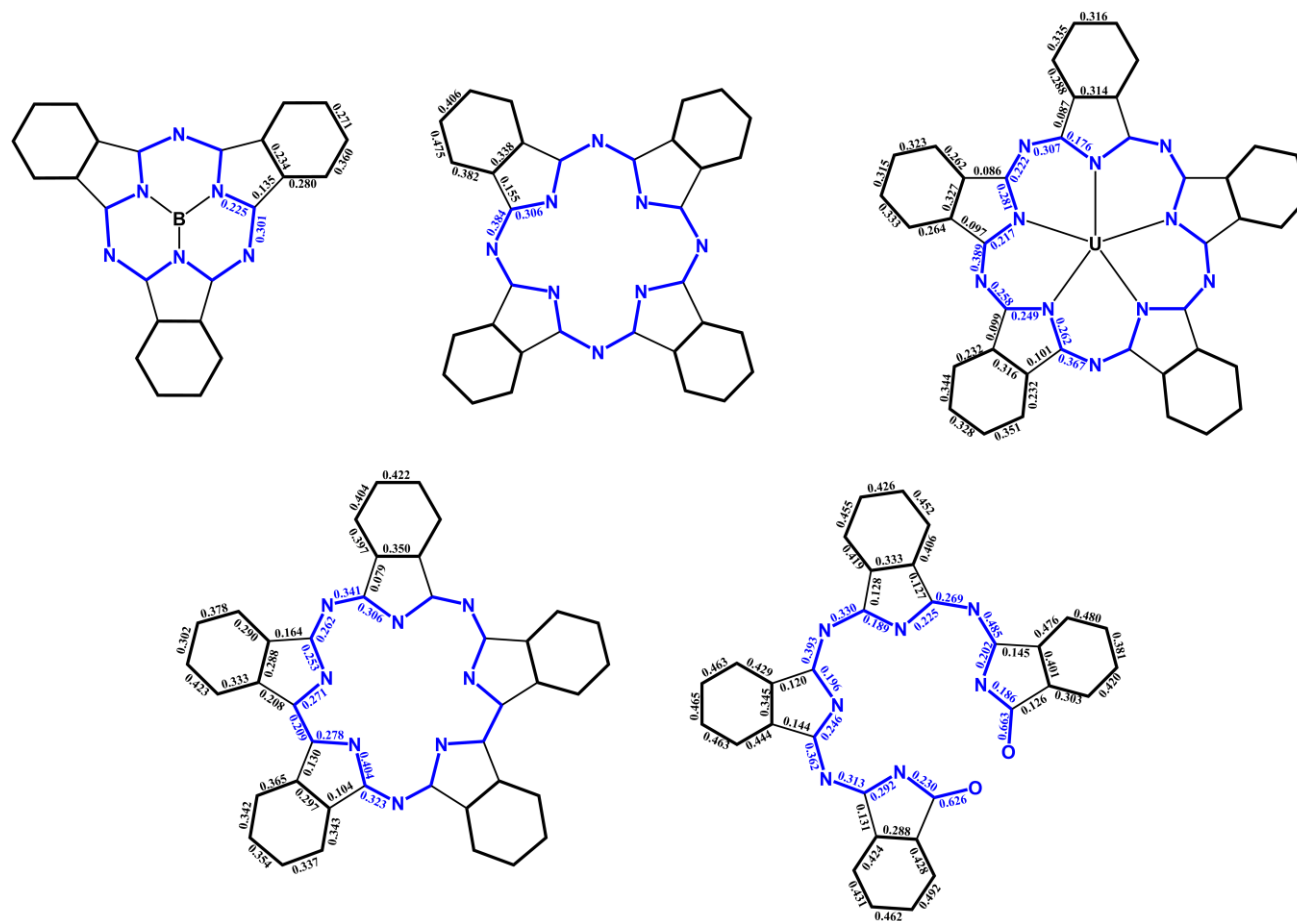

**Fig. S30** The  $\pi$  MBO of the traditional cyclic conjugated oligoisoindoles together with the phthalocyanine ring-cleavage derivative.

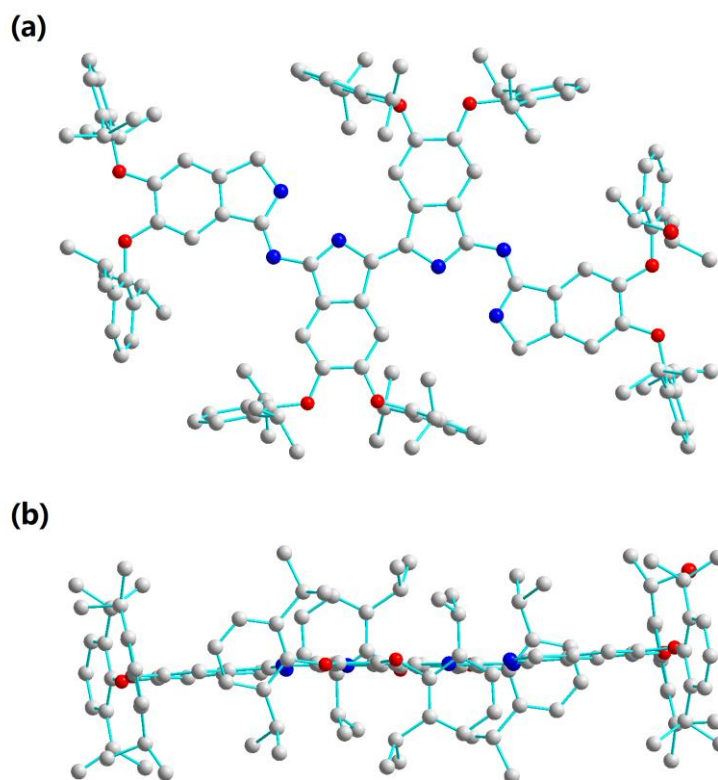

**Fig. S31** Molecular structure of **3** in top view (a) and side view (b). Hydrogen atoms are omitted for clarity (C grey, N blue, O red).

(a)

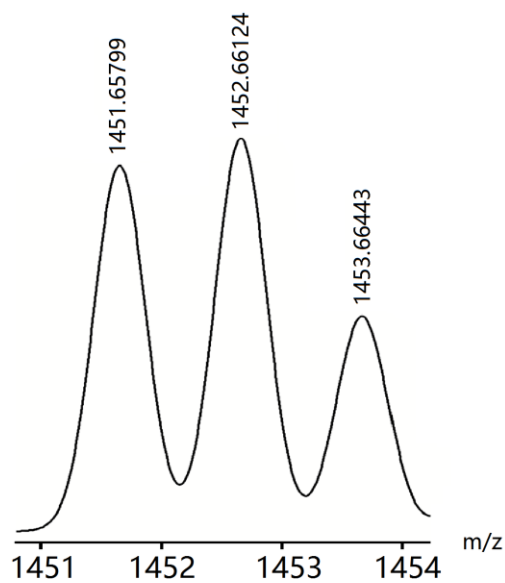

(b)

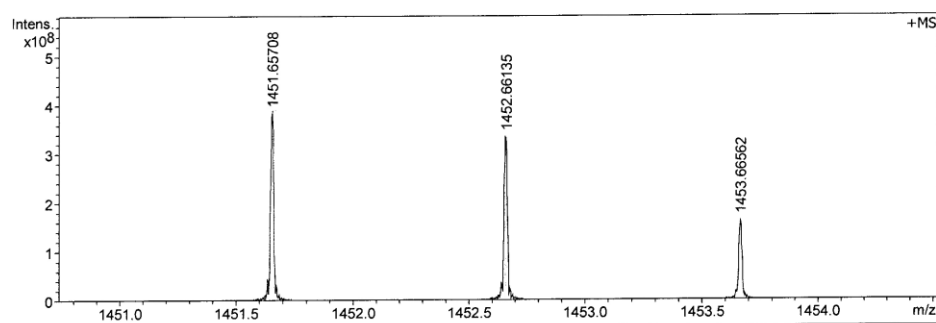

(c)

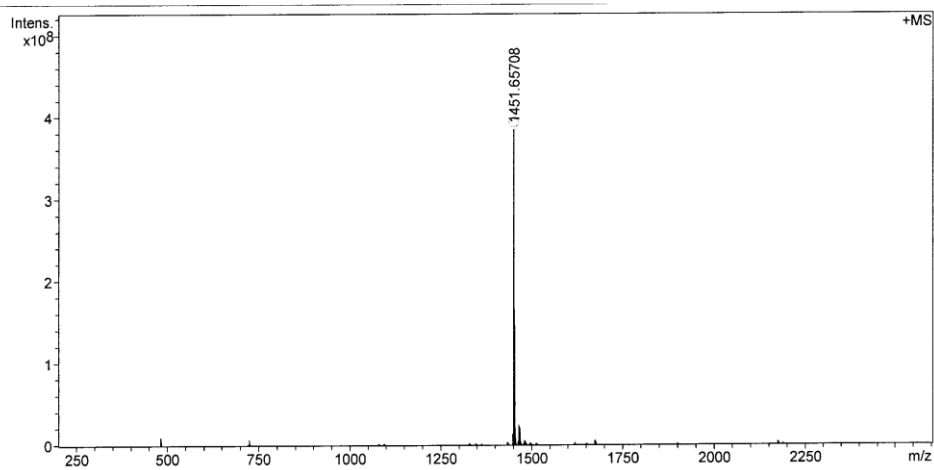

**Fig. S32** Simulated (a) and experimental isotopic (b) pattern of  $[M-H]^+$  and HR MS (c) for **5**.



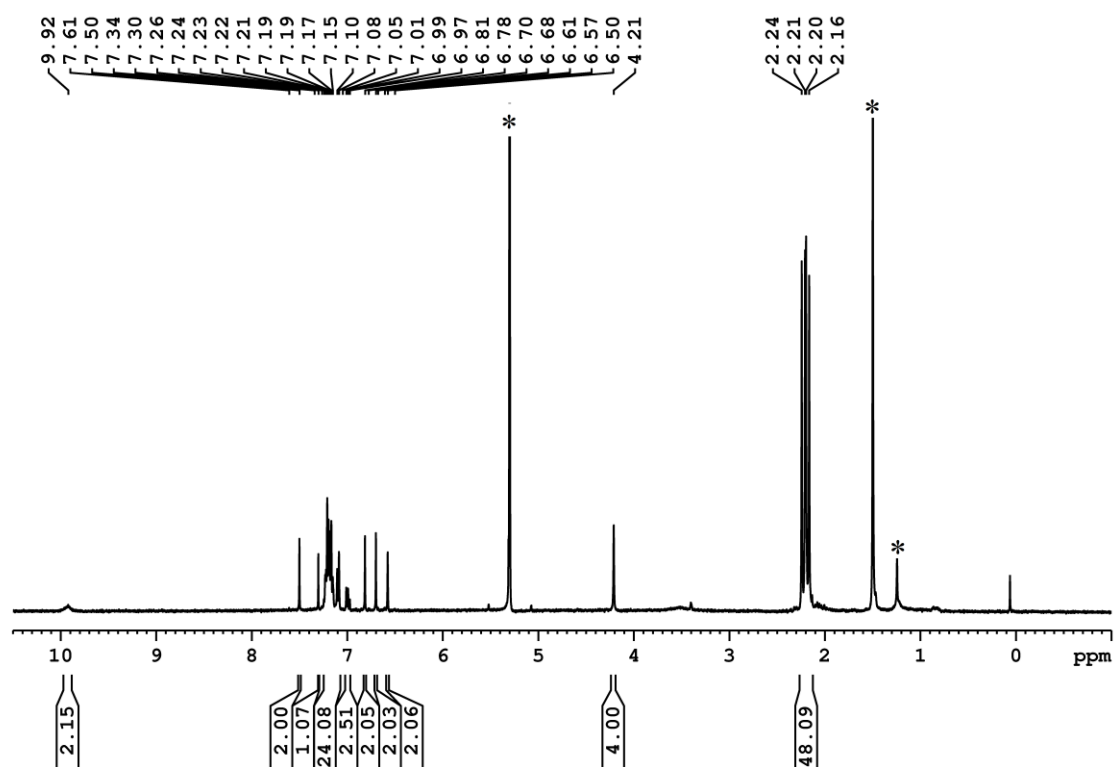

**Fig. S33**  $^1\text{H}$  NMR spectrum of **5** in  $\text{CD}_2\text{Cl}_2$  at 298K; \* indicates the signals for residual solvents.

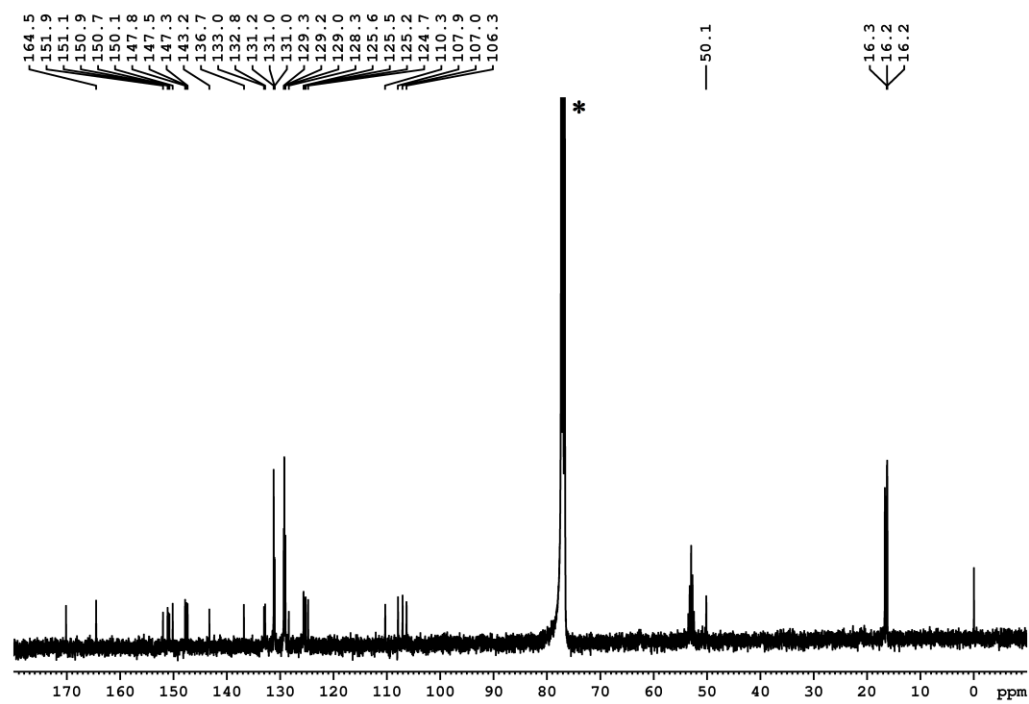

**Fig. S34**  $^{13}\text{C}$  NMR spectrum of **5** in  $\text{CDCl}_3$  at 298K. \* indicates the signals of residual solvent.

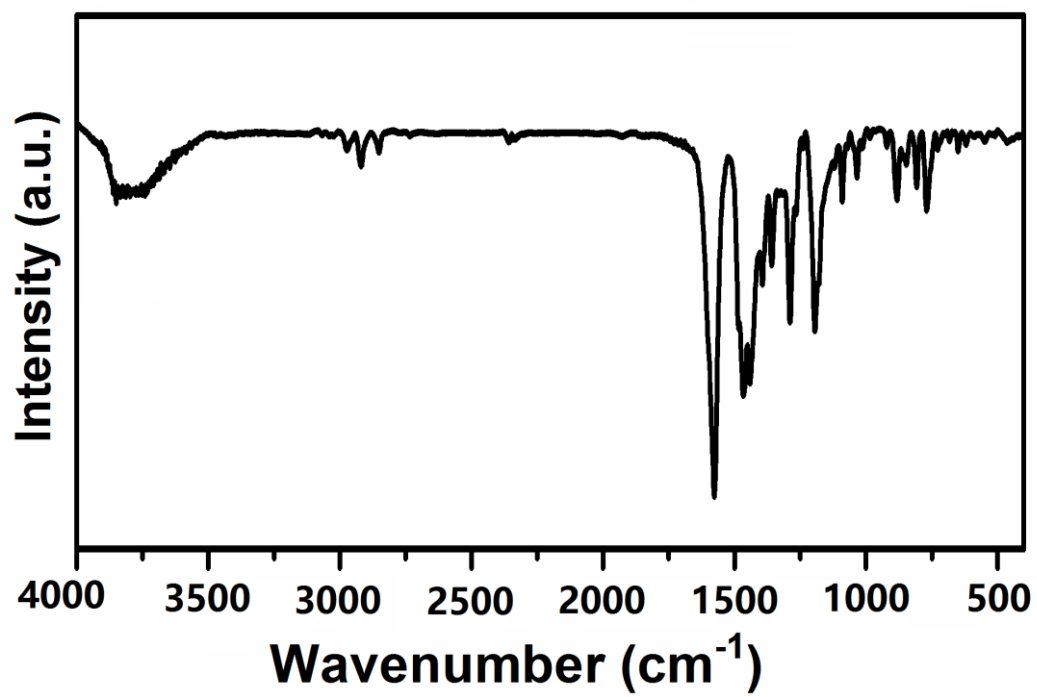

**Fig. S35** IR spectrum of **5** in the region of 400-4000 cm<sup>-1</sup>.

**Table S1.**  $^1\text{H}$  NMR data ( $\delta$ ) for compounds **1-4** in  $\text{CD}_2\text{Cl}_2$  at 298K.

| Compound | $\text{H}_{\text{NH}}$            | $\text{H}_\alpha$                                                                                                        | $\text{H}_{\text{aryl}}$                                                                                           | $\text{H}_{\text{methyne}}$ | $\text{H}_{\text{methyl}}$       | $\text{H}_{\text{SC12H25}}$                                                                          | $\text{H}_{\text{terminal}}$ |
|----------|-----------------------------------|--------------------------------------------------------------------------------------------------------------------------|--------------------------------------------------------------------------------------------------------------------|-----------------------------|----------------------------------|------------------------------------------------------------------------------------------------------|------------------------------|
| <b>1</b> | --                                | 7.77 (s, 2 H),<br>6.42(s, 2 H)                                                                                           | 7.27-7.23 (m, 12 H)                                                                                                | 3.16-3.13 (m, 8 H)          | 1.25-1.06 (m, 88 H) <sup>a</sup> | 2.81 (t, 4H, $J=4\text{Hz}$ ),<br>1.25-1.06 (m, 88 H), <sup>a</sup><br>0.86 (t, 6H, $J=4\text{Hz}$ ) | --                           |
| <b>2</b> | 9.84 (br, 1H)                     | 7.92 (s, 1 H),<br>6.85 (s, 1 H),<br>6.67 (s, 1H),<br>6.59 (s, 1H),<br>6.44 (s, 1 H),<br>7.40-7.22 (m, 19 H) <sup>a</sup> | 7.41-7.23 (m, 19 H) <sup>a</sup>                                                                                   | 3.16-3.10 (m, 12 H)         | 1.25-1.07 (m, 92 H) <sup>a</sup> | 2.70 (t, 2H, $J=4\text{Hz}$ ),<br>1.25-1.07 (m, 92 H), <sup>a</sup><br>0.85 (t, 3H, $J=4\text{Hz}$ ) | 4.05 (s, 2H)                 |
| <b>3</b> | 9.69 (br, 2 H)                    | 7.52 (s, 2 H),<br>6.83(s, 2 H),<br>6.70 (s, 2 H),<br>6.56 (s, 2 H)<br>7.52 (s, 2 H)                                      | 7.37-7.08 (m, 24 H)                                                                                                | 3.19-3.12 (m, 16 H)         | 1.12-1.06 (m, 96 H)              | --                                                                                                   | 3.96 (s, 4 H)                |
| <b>4</b> | 10.02 (br, 2 H)<br>8.85 (br, 1 H) | 6.92 (m, 4 H) <sup>a</sup><br>6.74 (s, 2 H)<br>6.62-6.57 (m, 6 H) <sup>a</sup><br>6.31 (m, 4 H) <sup>a</sup>             | 7.42-7.19 (m, 30 H)<br>6.92 (m, 4 H) <sup>a</sup><br>6.62-6.57 (m, 6 H) <sup>a</sup><br>6.31 (m, 4 H) <sup>a</sup> | 3.47-2.98 (m, 24 H)         | 1.33-0.72 (m, 144 H)             | --                                                                                                   | 4.17 (s, 4 H)                |

<sup>a</sup> These protons are overlapped.

**Table S2.** Crystallographic data for **1**, **3**, **4**, and **5**.

| Compound                                            | <b>1</b>                                                                      | <b>3</b>                                                                         | <b>4</b>                                                                          | <b>5</b>                                                                        |
|-----------------------------------------------------|-------------------------------------------------------------------------------|----------------------------------------------------------------------------------|-----------------------------------------------------------------------------------|---------------------------------------------------------------------------------|
| Molecular formula                                   | C <sub>88</sub> H <sub>122</sub> N <sub>2</sub> O <sub>4</sub> S <sub>2</sub> | C <sub>132</sub> H <sub>154</sub> Cl <sub>12</sub> N <sub>6</sub> O <sub>8</sub> | C <sub>202</sub> H <sub>249</sub> Cl <sub>14</sub> N <sub>9</sub> O <sub>15</sub> | C <sub>100</sub> H <sub>96</sub> Cl <sub>6</sub> N <sub>6</sub> O <sub>10</sub> |
| <i>M</i>                                            | 1336.00                                                                       | 2378.01                                                                          | 3439.40                                                                           | 1754.53                                                                         |
| Crystal system                                      | triclinic                                                                     | monoclinic                                                                       | triclinic                                                                         | Triclinic                                                                       |
| Space group                                         | <i>P1</i>                                                                     | <i>P21/c</i>                                                                     | <i>P-1</i>                                                                        | <i>P-1</i>                                                                      |
| <i>a</i> /Å                                         | 8.9041(4)                                                                     | 9.9153(2)                                                                        | 18.0089(5)                                                                        | 9.8074(5)                                                                       |
| <i>b</i> /Å                                         | 14.0916(7)                                                                    | 27.3670(5)                                                                       | 19.4187(5)                                                                        | 13.2321(5)                                                                      |
| <i>c</i> /Å                                         | 16.2768(8)                                                                    | 23.7531(4)                                                                       | 29.7417(7)                                                                        | 17.7176(7)                                                                      |
| $\alpha$ /°                                         | 104.121(4)                                                                    | 90                                                                               | 90.357(2)                                                                         | 100.836(3)                                                                      |
| $\beta$ /°                                          | 91.824(4)                                                                     | 93.290(2)                                                                        | 95.539(2)                                                                         | 99.601(4)                                                                       |
| $\gamma$ /°                                         | 94.954(4)                                                                     | 90                                                                               | 107.328(2)                                                                        | 93.264(3)                                                                       |
| <i>U</i> /Å <sup>3</sup>                            | 1970.23(16)                                                                   | 6434.8(2)                                                                        | 9875.8(4)                                                                         | 2217.35(17)                                                                     |
| <i>Z</i>                                            | 1                                                                             | 2                                                                                | 2                                                                                 | 1                                                                               |
| <i>D<sub>c</sub></i> /Mg m <sup>-3</sup>            | 1.126                                                                         | 1.227                                                                            | 1.190                                                                             | 1.314                                                                           |
| $\mu$ /mm <sup>-1</sup>                             | 0.989                                                                         | 2.807                                                                            | 2.264                                                                             | 2.281                                                                           |
| Data collection range/°                             | 3.25 to 67.14                                                                 | 3.23 to 65.00                                                                    | 3.22 to 67.27                                                                     | 3.41 to 66.99                                                                   |
| Reflections collected<br>/ unique                   | 24257 / 12106<br>[R(int) = 0.0380]                                            | 21859 / 10891<br>[R(int) = 0.0226]                                               | 67519 / 34508<br>[R(int) = 0.0394]                                                | 14923 / 7686<br>[R(int) = 0.0199]                                               |
| Data/restraints/parameters                          | 12106 / 3 / 883                                                               | 10891 / 0 / 741                                                                  | 34508 / 19 / 2215                                                                 | 7686 / 0 / 560                                                                  |
| <i>R</i> <sub>1</sub> [ <i>I</i> > 2σ( <i>I</i> )]  | 0.0466                                                                        | 0.0802                                                                           | 0.1121                                                                            | 0.0658                                                                          |
| <i>wR</i> <sub>2</sub> [ <i>I</i> > 2σ( <i>I</i> )] | 0.1245                                                                        | 0.2411                                                                           | 0.3263                                                                            | 0.1830                                                                          |
| Goodness of fit                                     | 1.024                                                                         | 1.063                                                                            | 1.300                                                                             | 1.018                                                                           |

**Table S3.** Electron density difference plots of electron transitions (isovalue:  $2.0 \times 10^{-4} e au^{-3}$ ) for **1**. Electron densities move from the cyan area to the purple area. Excited states with less than  $30000 \text{ cm}^{-1}$  and configurations which contribute more than 5% are shown (assignment: H = HOMO, L = LUMO, L+1 = LUMO+1, H-1 = HOMO-1, etc.).

|                                                                                   |                                                                                |                                                                                   |                                                                                                                          |
|-----------------------------------------------------------------------------------|--------------------------------------------------------------------------------|-----------------------------------------------------------------------------------|--------------------------------------------------------------------------------------------------------------------------|
| 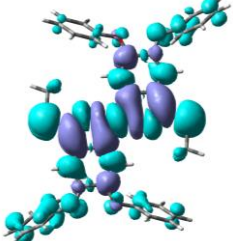 | <p><b>459.26 nm_3</b><br/>Main<br/>Transitions:<br/>H→L(89%)<br/>H-4→L(8%)</p> |  | <p><b>387.05 nm_5</b><br/>Main<br/>Transitions:<br/>H-4→L(89%)<br/>H→L(8%)</p>                                           |
|  | <p><b>292.18 nm_19</b><br/>Main<br/>Transitions:<br/>H-2→L+1<br/>(86%)</p>     |  | <p><b>250.32 nm_40</b><br/>Main<br/>Transitions:<br/>H-2→L+3(16%)<br/>H-2→L+7(28%)<br/>H-1→L+4(14%)<br/>H-1→L+8(31%)</p> |

**Table S4.** Electron density difference plots of electron transitions (isovalue:  $2.0 \times 10^{-4} e a.u.^{-3}$ ) for **2**. Electron densities move from the cyan area to the purple area. Excited states with less than  $30000 \text{ cm}^{-1}$  and configurations which contribute more than 5% are shown (assignment: H = HOMO, L = LUMO, L+1 = LUMO+1, H-1 = HOMO-1, etc.).

|                                                                                     |                                                                                                                       |                                                                                      |                                                                                         |
|-------------------------------------------------------------------------------------|-----------------------------------------------------------------------------------------------------------------------|--------------------------------------------------------------------------------------|-----------------------------------------------------------------------------------------|
| 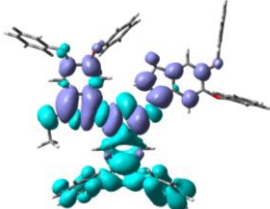   | <b>512.01 nm_1</b><br>Main<br>Transitions:<br>H-1→L(47%)<br>H→L(50%)                                                  |    | <b>493.26 nm_2</b><br>Main<br>Transitions:<br>H-1→L(52%)<br>H→L(45%)                    |
|    | <b>417.01 nm_4</b><br>Main<br>Transitions:<br>H-3→L (97%)                                                             |    | <b>388.28 nm_6</b><br>Main<br>Transitions:<br>H-5→L(94%)                                |
|    | <b>352.52 nm_9</b><br>Main<br>Transitions:<br>H-7→L(36%)<br>H-6→L(34%)<br>H→L+1(20%)                                  |    | <b>337.74 nm_12</b><br>Main<br>Transitions:<br>H-9→L(33%)<br>H→L+2(52%)                 |
|  | <b>285.32 nm_36</b><br>Main<br>Transitions:<br>H-4→L+1(10%)<br>H-3→L+1(6%)<br>H-2→L+2(25%)<br>H→L+8(7%)<br>H→L+9(34%) |  | <b>283.12 nm_39</b><br>Main<br>Transitions:<br>H-1→L+4(27%)<br>H→L+8(29%)<br>H→L+9(19%) |
|  | <b>247.82 nm_77</b><br>Main<br>Transitions:<br>H-9→L+1(25%)<br>H-1→L+14(46%)                                          |  | <b>247.15 nm_78</b><br>Main<br>Transitions:<br>H-2→L+9(43%)<br>H-1→L+11(52%)            |

**Table S5.** Electron density difference plots of electron transitions (isovalue:  $2.0 \times 10^{-4} e au^{-3}$ ) for **3**. Electron densities move from the cyan area to the purple area. Excited states with less than  $30000 \text{ cm}^{-1}$  and configurations which contribute more than 5% are shown (assignment: H = HOMO, L = LUMO, L+1 = LUMO+1, H-1 = HOMO-1, etc.).

|                                                                                   |                                                                         |                                                                                    |                                                                                                            |
|-----------------------------------------------------------------------------------|-------------------------------------------------------------------------|------------------------------------------------------------------------------------|------------------------------------------------------------------------------------------------------------|
| 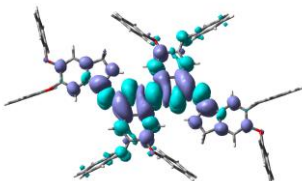 | <b>544.99 nm_1</b><br>Main<br>Transitions:<br>H→L(96%)                  |  | <b>474.86 nm_2</b><br>Main<br>Transitions:<br>H-1→L(96%)                                                   |
|  | <b>399.11 nm_5</b><br>Main<br>Transitions:<br>H-6→L (34%)<br>H-4→L(64%) |  | <b>350.95 nm_13</b><br>Main<br>Transitions:<br>H-8→L(68%)<br>H→L+2(24%)                                    |
|  | <b>331.76 nm_19</b><br>Main<br>Transitions:<br>H-11→L(77%)<br>H→L+2(7%) |  | <b>282.67 nm_55</b><br>Main<br>Transitions:<br>H-2→L+5(22%)<br>H-1→L+4(26%)<br>H-1→L+6(21%)<br>H→L+18(10%) |



**Table S6.** Electron density difference plots of electron transitions (isovalue:  $2.0 \times 10^{-4} e au^{-3}$ ) for **4**. Electron densities move from the cyan area to the purple area. Excited states with less than  $30000 \text{ cm}^{-1}$  and configurations which contribute more than 5% are shown (assignment: H = HOMO, L = LUMO, L+1 = LUMO+1, H-1 = HOMO-1, etc.).

|                                                                                   |                                                                                                   |                                                                                    |                                                                                      |
|-----------------------------------------------------------------------------------|---------------------------------------------------------------------------------------------------|------------------------------------------------------------------------------------|--------------------------------------------------------------------------------------|
| 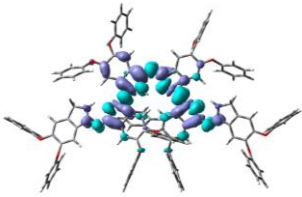 | <b>744.97 nm_1</b><br>Main<br>Transitions:<br>H→L(99%)                                            |  | <b>496.37 nm_4</b><br>Main<br>Transitions:<br>H-3→L(86%)<br>H→L+1(6%)                |
|  | <b>493.34 nm_5</b><br>Main<br>Transitions:<br>H-4→L(60%)<br>H-3→L(9%)<br>H-1→L(11%)<br>H→L+1(15%) |  | <b>464.97 nm_6</b><br>Main<br>Transitions:<br>H-4→L(34%)<br>H-1→L(22%)<br>H→L+1(35%) |
|  | <b>446.86 nm_8</b><br>Main<br>Transitions:<br>H-6→L(91%)                                          |  | <b>424.92 nm_10</b><br>Main<br>Transitions:<br>H-8→L(26%)<br>H-7→L(62%)              |
